# Supplementary material for: Structures of NHC Hg(ii) and Ag(i) complexes and selective recognition of nitrate anion
Source: Royal Society of Chemistry journal article supplement (doi:10.1039/c4ce01519c), 2014-12-22
Supplement: c4ce01519c1.pdf [file c4ce01519c1.pdf]

## SUPPLEMENTARY INFORMATION

### Structures of NHC Hg(II) and Ag(I) Complexes and Selective Recognition of Nitrate Anion

Qing-Xiang Liu\*, Zhi-Xiang Zhao, Xiao-Jun Zhao, Qing Wei, Ai-Hui Chen, Hui-Long Li, Xiu-Guang Wang

Tianjin Key Laboratory of Structure and Performance for Functional Molecules; Key Laboratory of Inorganic-Organic Hybrid Functional Material Chemistry, Ministry of Education; College of Chemistry, Tianjin Normal University, Tianjin 300387, China.

\* Corresponding author, E-mail: tjnulqx@163.com

### Contents

1. CCDC numbers for complexes **1-8**.
2. Tables S1-S3.
3. The crystal packings of complexes **1-8**
4. The figures of fluorescence and UV/vis spectroscopies for **6**.
5. The changes of  $^1\text{H}$  NMR spectra in benzene rings for **6** and **6**/ $\text{NO}_3^-$  and Scheme S1.
6. Preparation of bis-benzimidazolium (or bis-imidazolium) salts  $\text{L}^2\text{H}_2\cdot\text{Cl}_2\text{-L}^6\text{H}_2\cdot\text{Cl}_2$  and  $\text{L}^8\text{H}_2\cdot(\text{PF}_6)_2$ , and complexes  $[\text{L}^1\text{Hg}(\text{DMSO})](\text{HgI}_4)$  (**3**),  $[\text{L}^6\text{Hg}(\text{Hg}_2\text{I}_6)]$  (**4**),  $[\text{L}^8\text{Hg}_2\text{Cl}_2](\text{Hg}_3\text{Cl}_8)$  (**5**) and  $[[\text{L}^3\text{Ag}_2\text{Cl}_2]_2]$  (**8**).
7. The  $^1\text{H}$  NMR and  $^{13}\text{C}\{^1\text{H}\}$  NMR spectra of precursors  $\text{L}^1\text{H}_2\cdot\text{Cl}_2\text{-L}^6\text{H}_2\cdot\text{Cl}_2$ ,  $\text{L}^7\text{H}_2\cdot(\text{PF}_6)_2\text{-L}^8\text{H}_2\cdot(\text{PF}_6)_2$  and complexes **1-8**.

## 1. CCDC numbers for complexes 1-8.

CCDC 976658, 976659, 976656, 976652, 976655, 976657, 976653 and 976654 contains the supplementary crystallographic data for complexes **1-8**. These data can be obtained free of charge via <http://www.ccdc.cam.ac.uk/conts/retrieving.html>, or from the Cambridge Crystallographic Data Centre, 12 Union Road, Cambridge, CB2 1EZ, UK; fax: (+44) 1223-336-033; or e-mail: [deposit@ccdc.cam.ac.uk](mailto:deposit@ccdc.cam.ac.uk). Supplementary data, Figures and Tables associated with this article can be found in the online version.

## 2. Tables S1-S3

**Table S1** In the same ligand, the dihedral angles between two benzene rings from phenol ether (**A**), and dihedral angles between benzimidazole (or imidazole) rings and adjacent benzene rings from phenol ether (**B**) for complexes **1-8**. The dihedral angles ( $^{\circ}$ ) between two benzimidazole (or imidazole) rings in NHC-Metal-NHC units (**C**) for complexes **1-4** and **6-7**

| Compounds | <b>A</b>           | <b>B</b>                                | <b>C</b>           |
|-----------|--------------------|-----------------------------------------|--------------------|
| <b>1</b>  | 30.0(4) $^{\circ}$ | 77.3(6) $^{\circ}$ , 77.8(7) $^{\circ}$ | 36.1(3) $^{\circ}$ |
| <b>2</b>  | 46.4(3) $^{\circ}$ | 73.1(8) $^{\circ}$ , 82.4(3) $^{\circ}$ | 23.9(4) $^{\circ}$ |
| <b>3</b>  | 81.9(1) $^{\circ}$ | 78.7(5) $^{\circ}$ , 81.2(3) $^{\circ}$ | 8.6(5) $^{\circ}$  |
| <b>4</b>  | 7.5(1) $^{\circ}$  | 81.3(0) $^{\circ}$ , 88.4(0) $^{\circ}$ | 33.9(9) $^{\circ}$ |
| <b>5</b>  | 72.3(0) $^{\circ}$ | 72.6(1) $^{\circ}$ , 79.8(6) $^{\circ}$ | -                  |
| <b>6</b>  | 89.2(4) $^{\circ}$ | 61.3(1) $^{\circ}$ , 76.9(0) $^{\circ}$ | 28.3(2) $^{\circ}$ |
| <b>7</b>  | 76.2(1) $^{\circ}$ | 83.6(8) $^{\circ}$ , 85.0(7) $^{\circ}$ | 31.8(1) $^{\circ}$ |
| <b>8</b>  | 15.5(6) $^{\circ}$ | 81.0(1) $^{\circ}$ , 81.6(7) $^{\circ}$ | -                  |

**Table S2** Distances (Å) of  $\pi$ - $\pi$  interactions, and distances (Å) and angles ( $^{\circ}$ ) of C-H $\cdots\pi$  contacts for **1-4** and **6-8**

| Complex  | $\pi$ - $\pi$                        |                                      | C-H $\cdots\pi$ |                 |
|----------|--------------------------------------|--------------------------------------|-----------------|-----------------|
|          | Face-to-face                         | Center-to-center                     | H $\cdots\pi$   | C-H $\cdots\pi$ |
| <b>1</b> | 3.585(6) (benzimidazole)             | 3.715(1) (benzimidazole)             | –               | –               |
|          | 3.443(6) (benzimidazole to pyridine) | 3.869(1) (benzimidazole to pyridine) |                 |                 |
| <b>2</b> | 3.396(8) (benzene)                   | 3.610(1) (benzene)                   | –               | –               |
| <b>3</b> |                                      |                                      | 3.165(9)        | 134.2(3)        |
| <b>4</b> | –                                    | –                                    | 3.310(4)        | 101.0(1)        |
| <b>6</b> | 3.425(1) (benzimidazole)             | 3.634(2) (benzimidazole)             | 2.961(2)        | 153.3(6)        |
| <b>7</b> | –                                    | –                                    | 2.624(2)        | 143.2(2)        |
| <b>8</b> | –                                    | –                                    | 2.854(1)        | 147.5(2)        |
|          |                                      |                                      | 2.890(1)        | 127.3(2)        |

**Table S3** H-Bonding geometry (Å,  $^{\circ}$ ) for complexes **2-6**

| Compounds | D-H $\cdots$ A                           | D-H      | H $\cdots$ A | D $\cdots$ A | D-H $\cdots$ A |
|-----------|------------------------------------------|----------|--------------|--------------|----------------|
| <b>2</b>  | C(31)-H(31) $\cdots$ Cl(1) <sup>i</sup>  | 0.930(5) | 2.775(1)     | 3.703(5)     | 175.2(3)       |
|           | C(3)-H(3A) $\cdots$ Cl(3) <sup>i</sup>   | 0.970(4) | 2.754(1)     | 3.671(4)     | 157.8(2)       |
| <b>3</b>  | C(19)-H(19B) $\cdots$ O(3) <sup>i</sup>  | 0.970(0) | 2.696(6)     | 3.642(8)     | 165.1(3)       |
|           | C(27)-H(27B) $\cdots$ O(4) <sup>i</sup>  | 0.970(0) | 2.268(4)     | 3.177(6)     | 155.6(2)       |
|           | C(4)-H(4) $\cdots$ O(5) <sup>iii</sup>   | 0.930(0) | 2.511(5)     | 3.418(8)     | 165.1(3)       |
| <b>4</b>  | C(34)-H(34) $\cdots$ I(1) <sup>i</sup>   | 0.931(1) | 2.940(8)     | 3.751(1)     | 146.2(9)       |
|           | C(21)-H(21) $\cdots$ I(3) <sup>i</sup>   | 0.929(1) | 3.177(9)     | 3.893(1)     | 135.2(7)       |
| <b>5</b>  | C(15)-H(15B) $\cdots$ Cl(1)              | 0.970(1) | 2.801(2)     | 3.628(1)     | 143.6(7)       |
|           | C(26)-H(26A) $\cdots$ Cl(5) <sup>i</sup> | 0.970(1) | 2.818(2)     | 3.620(8)     | 140.6(6)       |
| <b>6</b>  | C(34)-H(34B) $\cdots$ I(4) <sup>i</sup>  | 0.970(1) | 3.006(8)     | 3.882(1)     | 150.6(6)       |

Symmetry code: i:  $3/2 - x, -1/2 + y, 1/2 - z$  for **2**; i:  $1 - x, 3 - y, -z$ , iii:  $1 + x, -1 + y, z$  for **3**; i:  $2 - x, 2 - y, 1 - z$  for **4**; i:  $x, 1.5 - y, 0.5 + z$  for **5**; i:  $1.5 + x, 3.5 - y, 0.5 + z$  for **6**.

### 3. The crystal packings of complexes 1-8

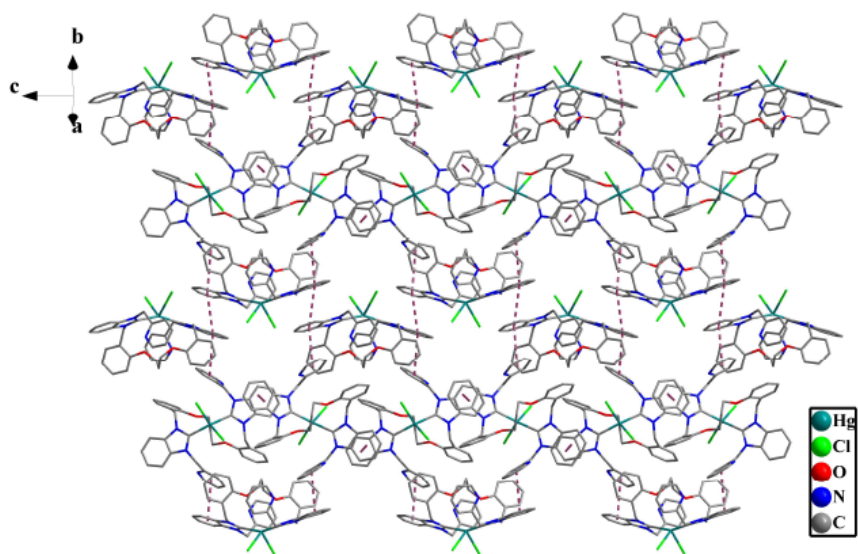

**Fig. S1(a)** 2D supramolecular layer of complex **1** via  $\pi$ - $\pi$  interactions. All hydrogen atoms were omitted for clarity.

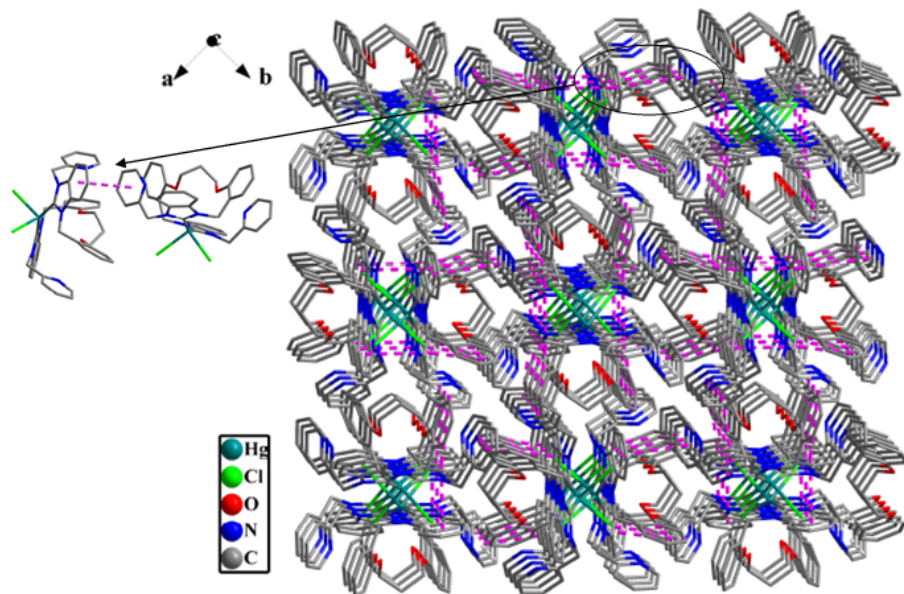

**Fig. S1(b)** 3D supramolecular network of complex **1** via  $\pi$ - $\pi$  interactions. All hydrogen atoms were omitted for clarity.

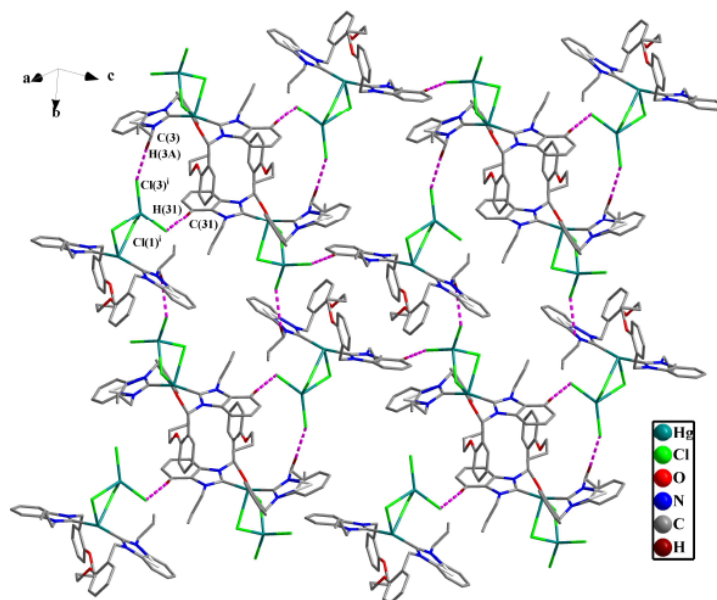

**Fig. S2(a)** 2D supramolecular layer of complex **2** via C-H...Cl hydrogen bonds. All hydrogen atoms except those participating in the C-H...Cl hydrogen bonds were omitted for clarity. Symm. Code:  $i: 3/2 - x, -1/2 + y, 1/2 - z$ .

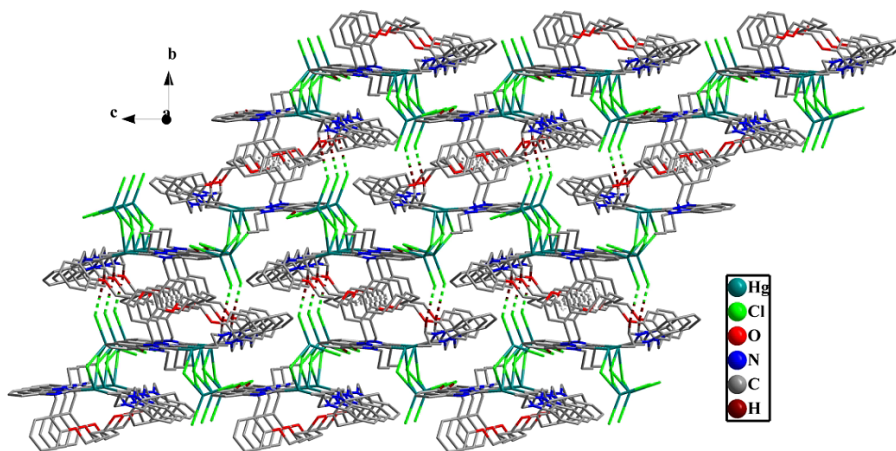

**Fig. S2(b)** 3D supramolecular network of complex **2** via C-H...Cl hydrogen bonds and  $\pi$ - $\pi$  interactions. All hydrogen atoms except those participating in the C-H...Cl hydrogen bonds were omitted for clarity.

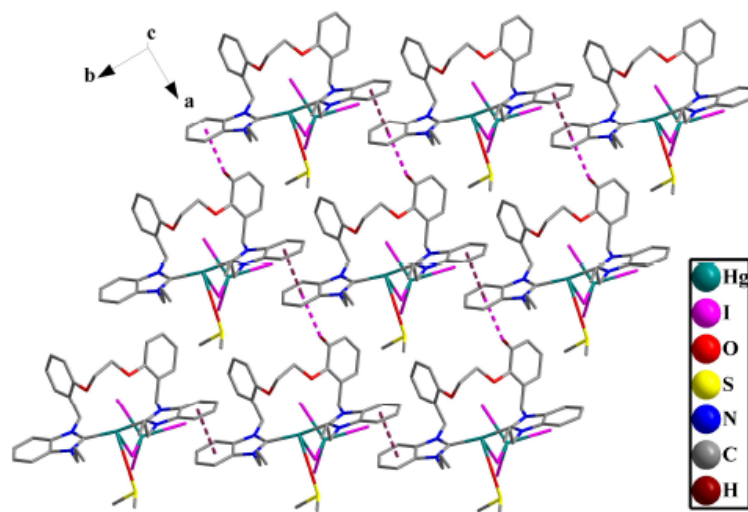

**Fig. S3(a)** 2D supramolecular layer of complex **3** via C-H $\cdots$  $\pi$  contacts and  $\pi$ - $\pi$  interactions. All hydrogen atoms except those participating in C-H $\cdots$  $\pi$  contacts were omitted for clarity.

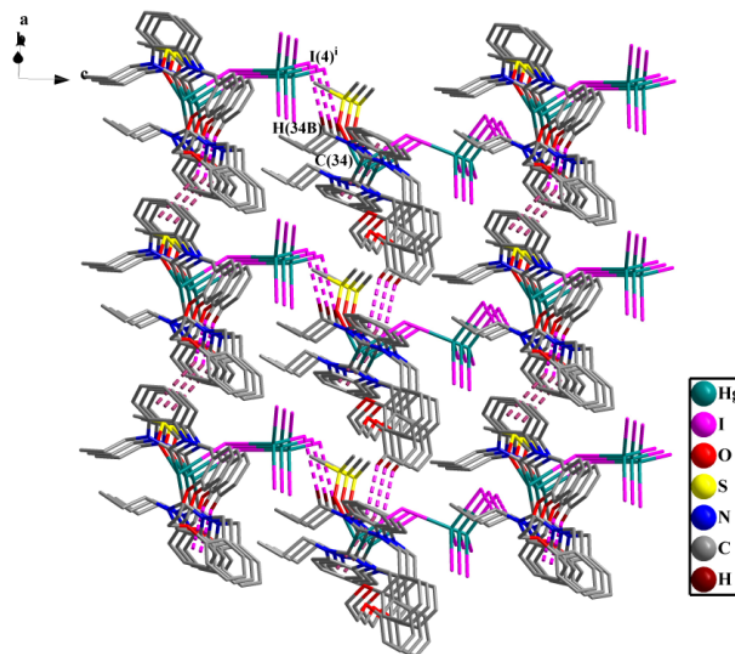

**Fig. S3(b)** 3D supramolecular network of complex **3** via C-H $\cdots$  $\pi$  contacts,  $\pi$ - $\pi$  interactions and C-H $\cdots$ I hydrogen bonds. All hydrogen atoms except those participating in C-H $\cdots$  $\pi$  contacts and C-H $\cdots$ I hydrogen bonds were omitted for clarity. Symm. Code:  $i: 1.5 + x, 3.5 - y, 0.5 + z$ .

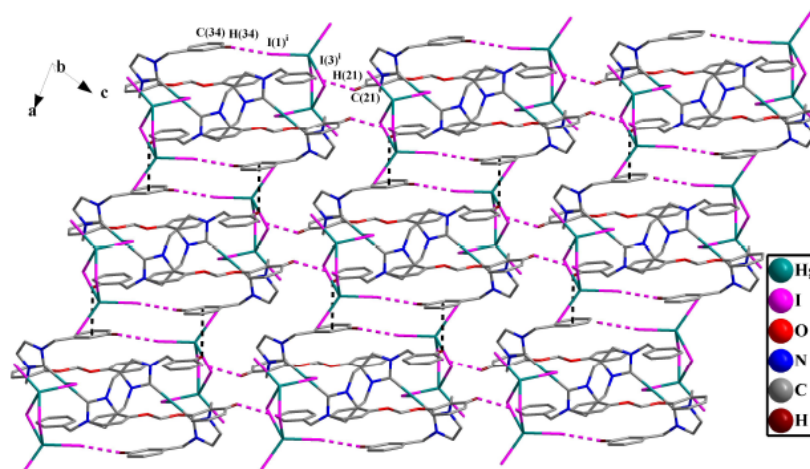

**Fig. S4** 2D supramolecular layer of complex **4** via C-H $\cdots$ I hydrogen bonds and C-H $\cdots$  $\pi$  contacts. All hydrogen atoms except those participating in the C-H $\cdots$ I hydrogen bonds and C-H $\cdots$  $\pi$  contacts were omitted for clarity. Symm. Code:  $i: 2 - x, 2 - y, 1 - z$ .

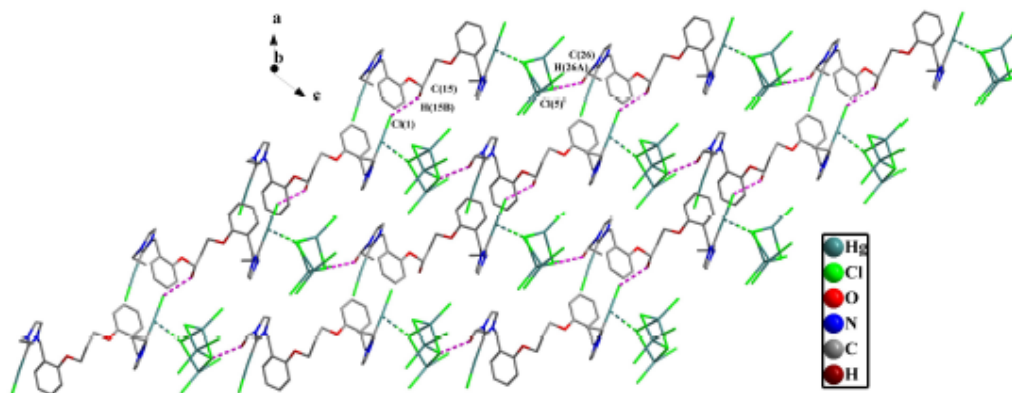

**Fig. S5** 2D supramolecular layer of complex **5** via C-H $\cdots$ Cl hydrogen bonds. All hydrogen atoms except those participating in the C-H $\cdots$ Cl hydrogen bonds were omitted for clarity. Symm. Code:  $i: x, 1.5 - y, 0.5 + z$ .

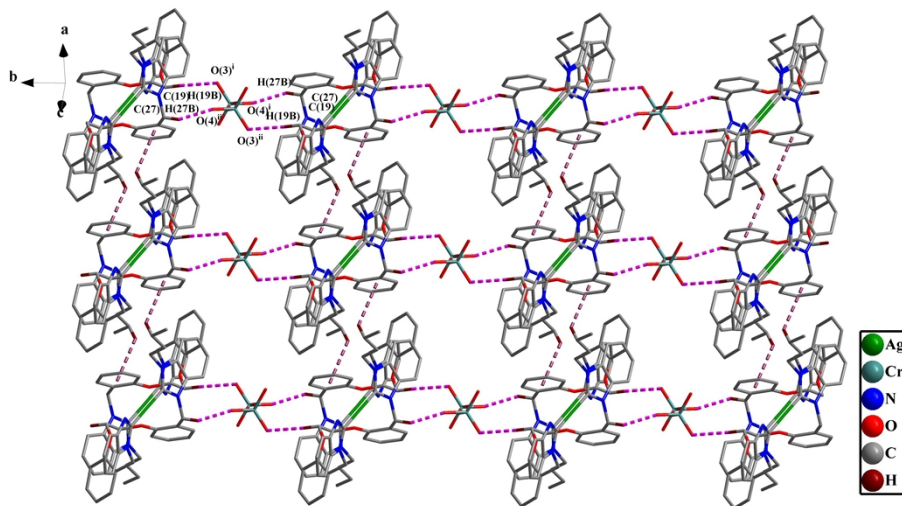

**Fig. S6(a)** 2D supramolecular layer of complex **6** via two types of C-H...O hydrogen bonds and C-H... $\pi$  contacts. All hydrogen atoms except those participating in C-H...O hydrogen bonds and C-H... $\pi$  contacts were omitted for clarity. Symm. Code: *i*: 1 - *x*, 3 - *y*, -*z*.

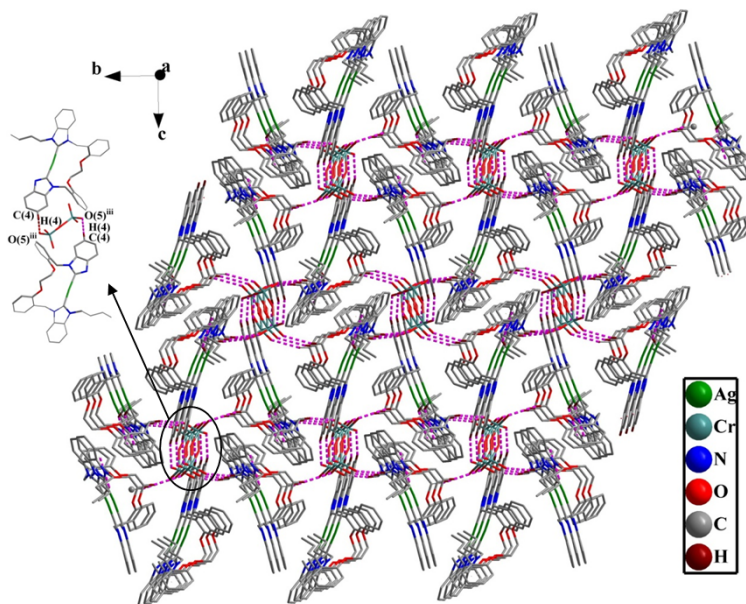

**Fig. S6(b)** 3D supramolecular network of complex **6** via C-H...O hydrogen bonds and C-H... $\pi$  contacts. All hydrogen atoms except those participating in the C-H...O hydrogen bonds and C-H... $\pi$  contacts were omitted for clarity. Symm. Code: *iii*: 1 + *x*, -1 + *y*, *z*.



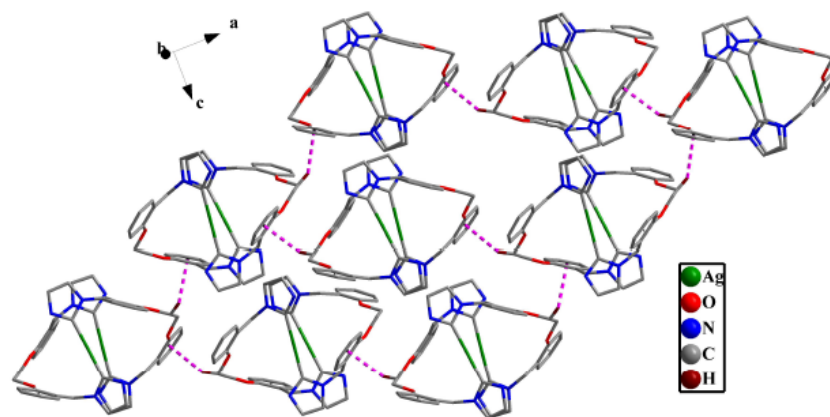

**Fig. S7(a)** 2D supramolecular layer of complex **7** via C-H... $\pi$  contacts. All hydrogen atoms except those participating in the C-H... $\pi$  contacts were omitted for clarity.

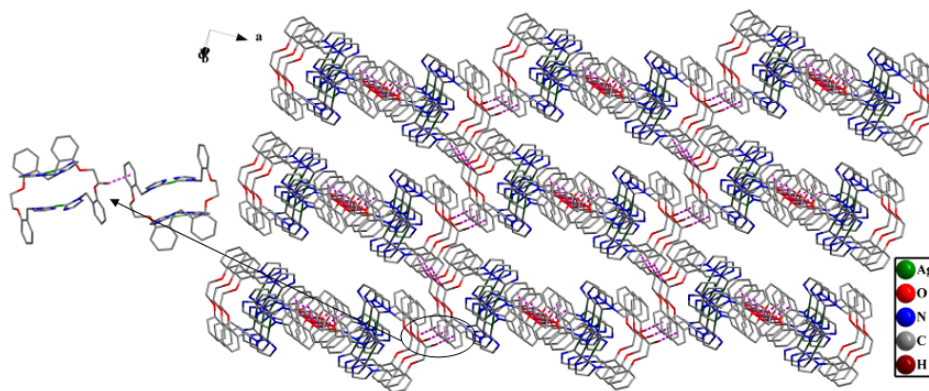

**Fig. S7(b)** 3D supramolecular architecture of complex **7** via C-H... $\pi$  contacts. All hydrogen atoms except those participating in the C-H... $\pi$  contacts were omitted for clarity.

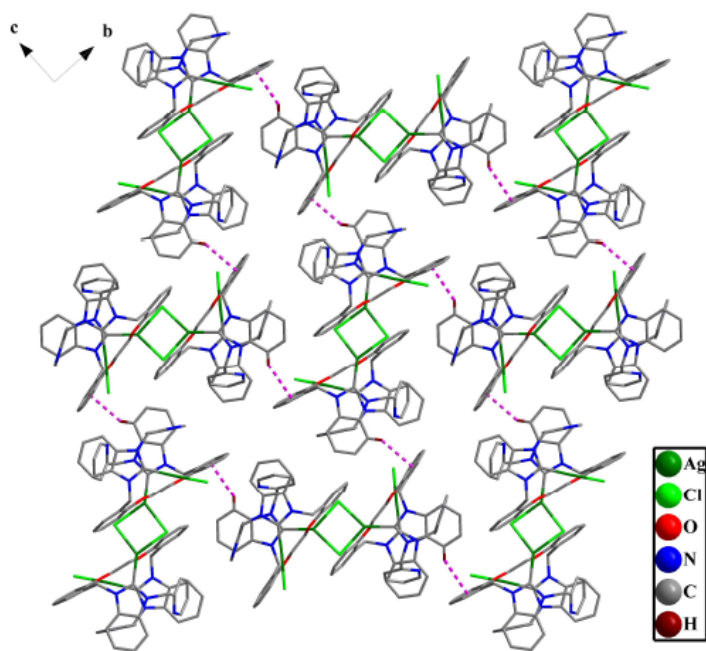

**Fig. S8(a)** 2D supramolecular layer of complex **8** via C-H... $\pi$  contacts. All hydrogen atoms except those participating in the C-H... $\pi$  contacts were omitted for clarity.

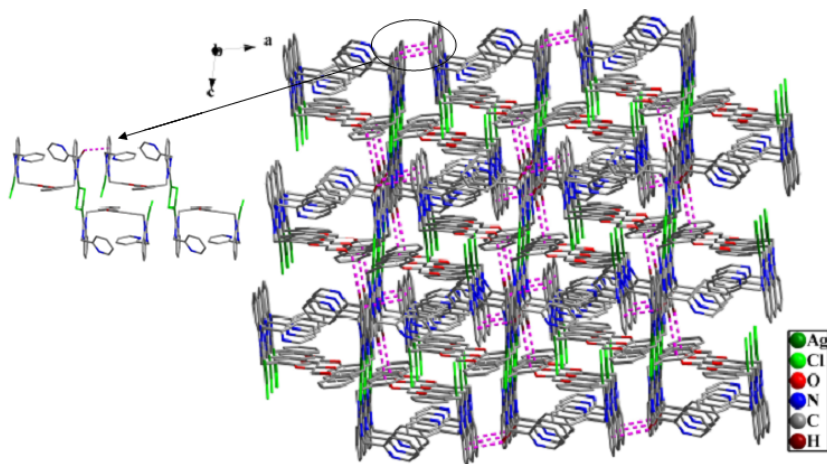

**Fig. S8(b)** 3D supramolecular network of complex **8** via C-H... $\pi$  contacts. All hydrogen atoms except those participating in the C-H... $\pi$  contacts were omitted for clarity.

#### 4. The figures of fluorescence and UV/vis spectroscopies for **6**

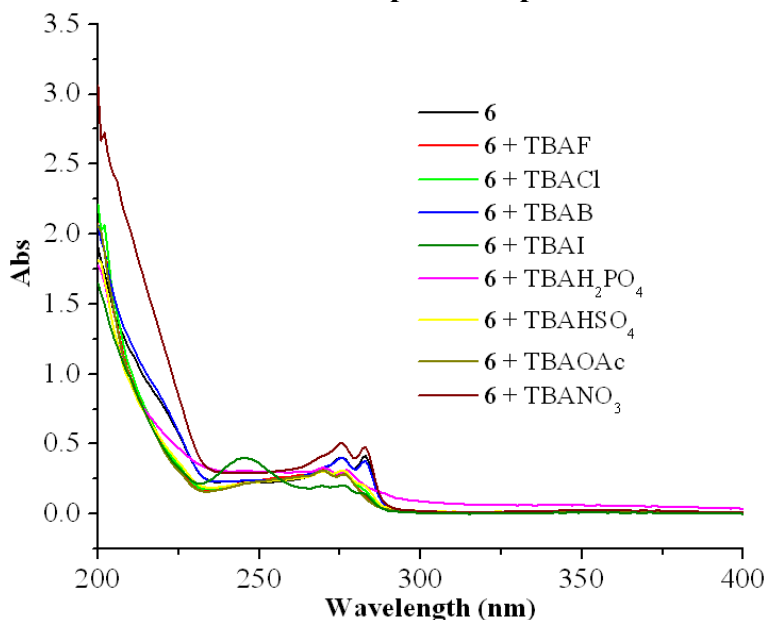

**Fig. S9** UV-vis absorption spectra of **6** ( $1 \times 10^{-5}$  mol/L) and upon the addition of the tetrabutyl ammonium salts of F<sup>-</sup>, Cl<sup>-</sup>, Br<sup>-</sup>, I<sup>-</sup>, H<sub>2</sub>PO<sub>4</sub><sup>-</sup>, HSO<sub>4</sub><sup>-</sup>, OAc<sup>-</sup> and NO<sub>3</sub><sup>-</sup> in acetonitrile at 25°C.

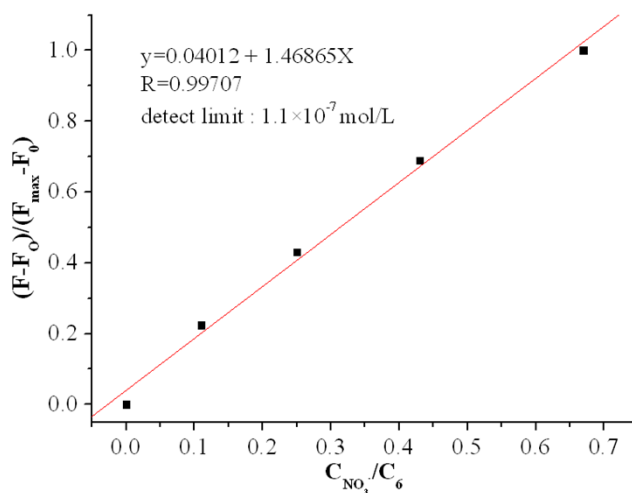

**Fig. S10** Emission (at 254 nm) of **6** at different concentrations of NO<sub>3</sub><sup>-</sup> (0, 0.11, 0.25, 0.43, 0.67 μM) added, normalized between the minimum emission (0.0 μM NO<sub>3</sub><sup>-</sup>) and the emission at 0.67 μM NO<sub>3</sub><sup>-</sup>. The detection limit was determined to be  $1.1 \times 10^{-7}$  mol/L.

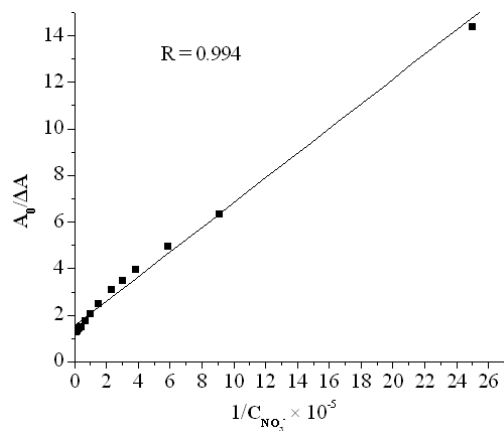

**Fig. S11** Benesi-Hildebrand plot of **6** ( $1 \times 10^{-5}$  mol/L) in the presence of  $NO_3^-$  in acetonitrile at 25 °C. The concentrations of  $NO_3^-$  are 0.04, 0.11, 0.17, 0.26, 0.33, 0.43, 0.67, 1, 1.5, 2.4, 3, 4, 6, 9 mol/L.

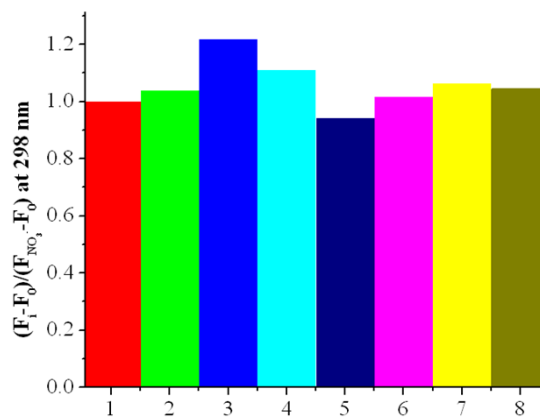

**Fig. S12** Change ratio  $((F_1 - F_0)/(F_{NO_3^-} - F_0))$  of fluorescence intensity of **6** upon addition of 1 equiv.  $NO_3^-$  in the presence of 5 equiv. of background anions. 1:  $NO_3^-$ ; 2:  $NO_3^- + F^-$ ; 3:  $NO_3^- + Cl^-$ ; 4:  $NO_3^- + Br^-$ ; 5:  $NO_3^- + I^-$ ; 6:  $NO_3^- + H_2PO_4^-$ ; 7:  $NO_3^- + HSO_4^-$ ; 8:  $NO_3^- + OAc^-$  in acetonitrile at 25 °C.

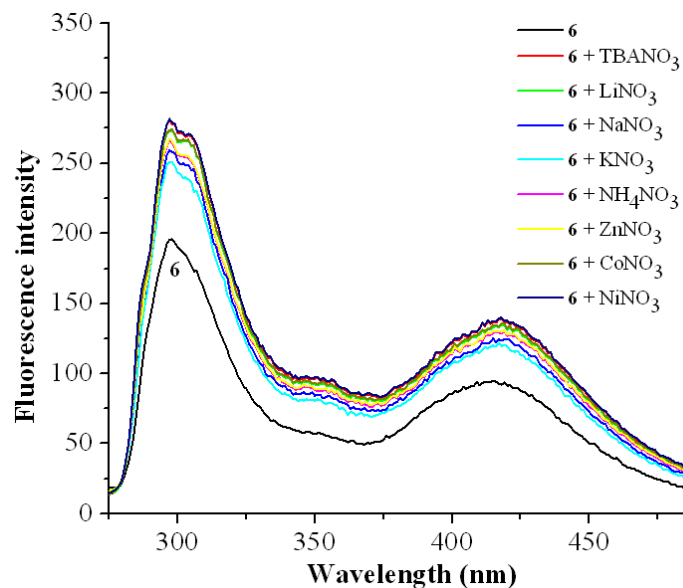

**Fig. S13** Fluorescence spectra of **6** ( $1 \times 10^{-5}$  mol/L) upon addition of nitrate salts ( $15 \times 10^{-5}$  mol/L) with different cations ( $\text{Li}^+$ ,  $\text{Na}^+$ ,  $\text{K}^+$ ,  $\text{NH}_4^+$ ,  $\text{Zn}^{2+}$ ,  $\text{Co}^{2+}$  and  $\text{Ni}^{2+}$ ).

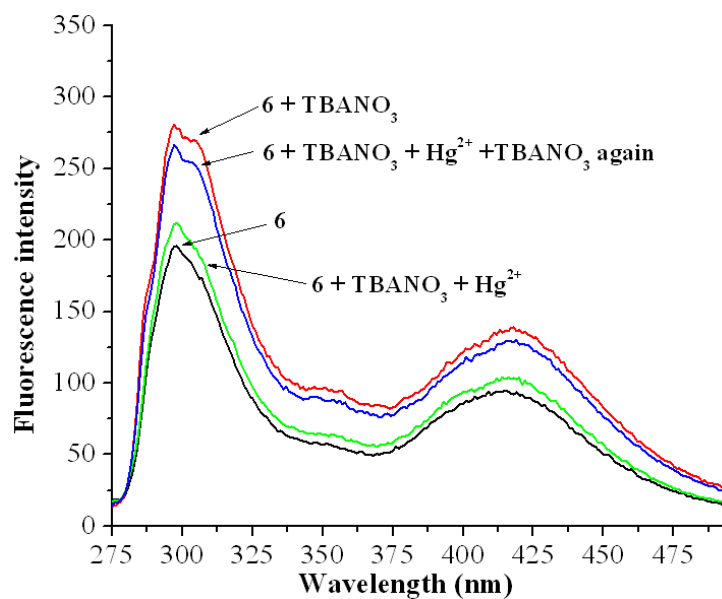

**Fig. S14** Fluorescence spectra of **6** ( $1.0 \times 10^{-5}$  mol/L) upon the addition of 15 equiv. of  $\text{NO}_3^-$  in acetonitrile.  $\text{Hg}^{2+}$  (7.5 equiv.) was added to **6** and  $\text{NO}_3^-$  mixture to show the reversible binding nature of  $\text{NO}_3^-$  with **6**.

## 5. The changes of $^1\text{H}$ NMR spectra in benzene rings for **6** and **6/NO<sub>3</sub><sup>-</sup>** and Scheme S1

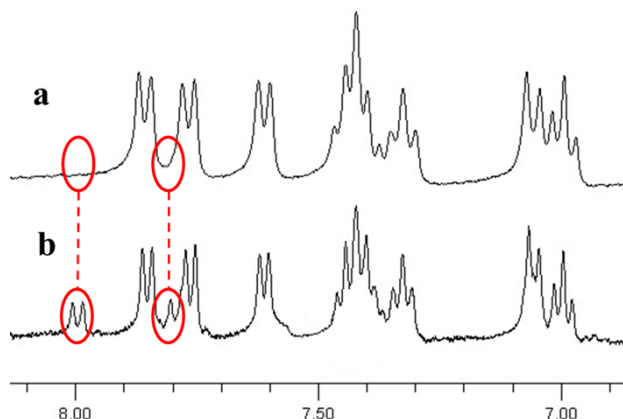

**Fig. S15**  $^1\text{H}$  NMR (400 MHz, DMSO- $d_6$ ): The changes of  $^1\text{H}$  NMR spectra in benzene rings of phenol ether for **6** and **6/NO<sub>3</sub><sup>-</sup>**. a: complex **6**, b: **6/NO<sub>3</sub><sup>-</sup>**.

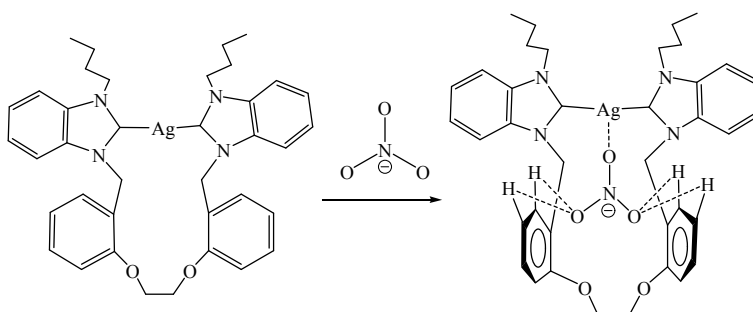

**Scheme S1** The interactions of  $\text{NO}_3^-$  with complex **6**.

## 6. Preparation of bis-benzimidazolium (or bis-imidazolium) salts $\text{L}^2\text{H}_2 \cdot \text{Cl}_2$ - $\text{L}^6\text{H}_2 \cdot \text{Cl}_2$ and $\text{L}^8\text{H}_2 \cdot (\text{PF}_6)_2$ , and complexes $[\text{L}^1\text{Hg}(\text{DMSO})](\text{HgI}_4)$ (**3**), $[\text{L}^6\text{Hg}(\text{Hg}_2\text{I}_6)]$ (**4**), $[\text{L}^8\text{Hg}_2\text{Cl}_2](\text{Hg}_3\text{Cl}_8)$ (**5**) and $[[\text{L}^3\text{Ag}_2\text{Cl}_2]_2]$ (**8**).

### Preparation of 1,2-bis[2-(N-<sup>n</sup>butylbenzimidazoliumylmethyl)phenoxy]ethylene chloride ( $\text{L}^2\text{H}_2 \cdot \text{Cl}_2$ )

This compound was prepared in a manner analogous to that of  $\text{L}^1\text{H}_2 \cdot \text{Cl}_2$ , only N-<sup>n</sup>butylbenzimidazole (2.578 g, 14.8 mmol) was used instead of N-<sup>n</sup>butylbenzimidazole. Yield: 4.022 g (91%). M.p.: 274-276 °C. Anal. Calcd for  $\text{C}_{38}\text{H}_{44}\text{O}_2\text{N}_4\text{Cl}_2$ : C, 69.18; H, 6.72; N, 8.49%. Found: C, 69.44; H, 6.51; N, 8.68%.  $^1\text{H}$  NMR (400 MHz, DMSO- $d_6$ ):  $\delta$

0.84 (t,  $J = 7.4$  Hz, 6H,  $CH_3$ ), 1.26 (m, 4H,  $CH_2$ ), 1.80 (m, 4H,  $CH_2$ ), 4.30 (s, 4H,  $OCH_2$ ), 4.37 (t,  $J = 7.2$  Hz, 4H,  $CH_2$ ), 5.57 (s, 4H,  $CH_2$ ), 7.12 (m, 4H,  $ArH$ ), 7.43 (m, 4H,  $ArH$ ), 7.60 (m, 4H,  $ArH$ ), 7.78 (d,  $J = 8.4$  Hz, 2H,  $ArH$ ), 7.98 (d,  $J = 8.4$  Hz, 2H,  $ArH$ ), 9.70 (s, 2H, 2-bimiH).  $^{13}C\{^1H\}$  NMR (100 MHz, DMSO- $d_6$ ):  $\delta$  13.2 ( $CH_3$ ), 19.0 ( $CH_2$ ), 30.5 ( $CH_2$ ), 45.9 ( $CH_2$ ), 46.3 ( $CH_2$ ), 66.6 ( $CH_2$ ), 112.4 (PhC), 113.6 (bimiC), 113.7 (bimiC), 121.0 (bimiC or PhC), 121.6 (bimiC or PhC), 126.3 (PhC), 130.8 (bimiC or PhC), 142.5 (2-bimiC), 156.4 (PhC).

**Preparation of 1,2-bis[2-(N-picolylbenzimidazoliummethyl)phenoxy]ethylene chloride ( $L^3H_2 \cdot Cl_2$ )**

This compound was prepared in a manner analogous to that of  $L^1H_2 \cdot Cl_2$ , only N-picolylbenzimidazole (3.096 g, 14.8 mmol) was used instead of N-<sup>n</sup>butylbenzimidazole. Yield: 3.327 g (68%), M.p.: 174-176 °C. Anal. Calcd for  $C_{42}H_{38}O_2N_6Cl_2$ : C, 69.13; H, 5.24; N, 11.51%. Found: C, 69.47; H, 5.66; N, 11.34%.  $^1H$  NMR (400 MHz, DMSO- $d_6$ ):  $\delta$  4.31 (s, 4H,  $CH_2$ ), 5.69 (s, 4H,  $CH_2$ ), 5.92 (s, 4H,  $CH_2$ ), 7.04 (d,  $J = 8.0$  Hz, 4H,  $ArH$ ), 7.15 (m, 2H,  $ArH$ ), 7.42 (m, 4H,  $ArH$ ), 7.52 (t,  $J = 6.0$  Hz, 2H,  $ArH$ ), 7.66 (t,  $J = 8.0$  Hz, 4H,  $ArH$ ), 7.90 (m, 6H,  $ArH$ ), 8.24 (d,  $J = 4.0$  Hz, 2H,  $ArH$ ), 10.14 (s, 2H, 2-bimiH).  $^{13}C\{^1H\}$  NMR (100 MHz, DMSO- $d_6$ ):  $\delta$  46.2 ( $CH_2$ ), 50.6 ( $CH_2$ ), 66.2 ( $CH_2$ ), 112.3 (PhC), 113.7 (bimiC), 113.8 (bimiC), 120.9 (bimiC or PhC), 121.3 (bimiC or PhC), 122.6 (PhC or PyC), 123.4 (PhC or PyC), 126.3 (PhC), 126.5 (PhC), 130.8 (bimiC or PhC), 130.9 (bimiC or PhC), 131.1 (PyC), 137.4 (PyC), 143.5 (2-bimiC), 149.3 (PyC), 152.8 (PyC), 156.4 (PhC) (Py = pyridine).

**Preparation of 1,3-bis[2-(N-picolylbenzimidazoliummethyl)phenoxy]propylene chloride ( $L^4H_2 \cdot Cl_2$ )**

This compound was prepared in a manner analogous to that of  $L^1H_2 \cdot Cl_2$ , only 1,3-dibromopropane (10.740 g, 53.2 mmol) and N-picolylbenzimidazole (3.096 g, 14.8 mmol) were used instead of 1,2-dibromoethane and N-<sup>n</sup>butylbenzimidazole. Yield: 3.523 g (70%). M.p.: 192-194 °C. Anal. Calcd for  $C_{43}H_{40}O_2N_6Cl_2$ : C, 69.44; H, 5.42; N, 11.30%.

Found: C, 69.71; H, 5.47; N, 11.58%.  $^1\text{H}$  NMR (400 MHz, DMSO- $d_6$ ):  $\delta$  2.04 (t,  $J$  = 6.0 Hz, 2H,  $\text{CH}_2$ ), 4.02 (t,  $J$  = 5.8 Hz, 4H,  $\text{CH}_2$ ), 5.78 (s, 4H,  $\text{CH}_2$ ), 6.00 (s, 4H,  $\text{CH}_2$ ), 7.62 (m, 4H,  $\text{ArH}$ ), 7.70 (d,  $J$  = 7.6 Hz, 4H,  $\text{ArH}$ ), 7.88 (q,  $J$  = 5.1 Hz, 4H,  $\text{ArH}$ ), 7.94 (q,  $J$  = 8.0 Hz, 4H,  $\text{ArH}$ ), 8.00 (q,  $J$  = 8.0 Hz, 4H,  $\text{ArH}$ ), 8.01 (d,  $J$  = 12.0 Hz, 2H,  $\text{ArH}$ ), 8.39 (d,  $J$  = 4.0 Hz, 2H,  $\text{ArH}$ ), 10.18 (s, 2H, 2-bimiH).  $^{13}\text{C}\{^1\text{H}\}$  NMR (100 MHz, DMSO- $d_6$ ):  $\delta$  28.1 ( $\text{CH}_2$ ), 48.5 ( $\text{CH}_2$ ), 50.6 ( $\text{CH}_2$ ), 64.6 ( $\text{CH}_2$ ), 112.0 (PhC), 113.9 (bimiC), 120.6 (bimiC or PhC), 121.1 (bimiC or PhC), 122.7 (PhC or PyC), 123.6 (PhC or PyC), 126.4 (PhC), 126.5 (PhC), 130.8 (bimiC or PhC), 130.9 (bimiC or PhC), 131.2 (PyC), 137.4 (PyC), 143.5 (2-bimiC), 149.4 (PyC), 152.9 (PyC), 156.6 (PhC).

**Preparation of 1,4-bis[2-(N- $n$ propylbenzimidazoliummethyl)phenoxy]butylene chloride ( $\text{L}^5\text{H}_2\cdot\text{Cl}_2$ )**

This compound was prepared in a manner analogous to that of  $\text{L}^1\text{H}_2\cdot\text{Cl}_2$ , only 1,4-dibromobutane (11.486 g, 53.2 mmol) and N- $n$ propylbenzimidazole (2.371 g, 14.8 mmol) were used instead of 1,2-dibromoethane and N- $n$ butylbenzimidazole. Yield: 3.223 g (72%)  
M.p.: 198-200 °C. Anal. Calcd for  $\text{C}_{38}\text{H}_{44}\text{O}_2\text{N}_4\text{Cl}_2$ : C, 69.18; H, 6.72; N, 8.49%. Found: C, 69.52; H, 6.83; N, 8.74%.  $^1\text{H}$  NMR (400 MHz, DMSO- $d_6$ ):  $\delta$  0.89 (t,  $J$  = 8.0 Hz, 6H,  $\text{CH}_3$ ), 1.67 (s, 4H,  $\text{CH}_2$ ), 3.36 (m, 4H,  $\text{CH}_2$ ), 3.98 (s, 4H,  $\text{CH}_2$ ), 4.51 (t,  $J$  = 6.0 Hz, 4H,  $\text{CH}_2$ ), 5.69 (s, 4H,  $\text{CH}_2$ ), 7.05 (q,  $J$  = 8.1 Hz, 4H,  $\text{ArH}$ ), 7.40 (m, 2H,  $\text{ArH}$ ), 7.54 (q,  $J$  = 18.7 Hz, 2H,  $\text{ArH}$ ), 7.67 (m, 4H,  $\text{ArH}$ ), 7.97 (q,  $J$  = 4.0 Hz, 2H,  $\text{ArH}$ ), 8.13 (d,  $J$  = 8.0 Hz, 2H,  $\text{ArH}$ ), 9.88 (s, 2H, 2-bimiH).  $^{13}\text{C}\{^1\text{H}\}$  NMR (100 MHz, DMSO- $d_6$ ):  $\delta$  10.5 ( $\text{CH}_3$ ), 22.1 ( $\text{CH}_2$ ), 25.0 ( $\text{CH}_2$ ), 48.0 ( $\text{CH}_2$ ), 55.9 ( $\text{CH}_2$ ), 67.3 ( $\text{CH}_2$ ), 112.1 (PhC), 113.7 (bimiC), 113.8 (bimiC), 120.5 (bimiC or PhC), 121.2 (bimiC or PhC), 126.5 (PhC), 130.6 (bimiC or PhC), 130.7 (bimiC or PhC), 131.0 (bimiC or PhC), 142.5 (2-bimiC), 156.5 (PhC).

**Preparation of 1,1-bis[2-(N-benzylimidazoliummethyl)phenoxy]methylen chloride ( $\text{L}^6\text{H}_2\cdot\text{Cl}_2$ )**

This compound was prepared in a manner analogous to that of  $\text{L}^1\text{H}_2\cdot\text{Cl}_2$ , only 1,1-dibromomethane (9.248 g, 53.2 mmol) and N-benzylimidazole (2.341 g, 14.8 mmol)



were used instead of 1,2-dibromoethane and N-<sup>n</sup>butylbenzimidazole. Yield: 3.786 g (92%). M.p.: 190-192 °C. Anal. Calcd for C<sub>35</sub>H<sub>34</sub>O<sub>2</sub>N<sub>4</sub>Cl<sub>2</sub>: C, 68.51; H, 5.58; N, 9.13%. Found: C, 68.23; H, 5.61; N, 9.59%. <sup>1</sup>H NMR (400 MHz, DMSO-d<sub>6</sub>): δ 5.36 (s, 4H, CH<sub>2</sub>), 5.46 (s, 4H, CH<sub>2</sub>), 6.04 (s, 2H, OCH<sub>2</sub>), 7.10 (s, 2H, ArH), 7.46 (m, 16H, ArH), 7.75 (s, 2H, ArH), 7.84 (s, 2H, ArH), 9.75 (s, 2H, 2-imiH). <sup>13</sup>C{<sup>1</sup>H} NMR (100 MHz, DMSO-d<sub>6</sub>): δ 47.9 (CH<sub>2</sub>), 51.7 (CH<sub>2</sub>), 114.0 (PhC), 122.3 (PhC), 122.4 (PhC), 122.8 (PhC), 122.9 (PhC), 128.2 (PhC), 128.6 (PhC), 128.9 (PhC), 130.8 (imiC or PhC), 131.0 (imiC or PhC), 134.9 (PhC), 136.5 (2-imiC), 154.1 (PhC) (imi = imidazole).

**Preparation of 1,3-bis[2-(N-ethylimidazoliumylmethyl)phenoxy]propylene hexafluorophosphate (L<sup>8</sup>H<sub>2</sub>·(PF<sub>6</sub>)<sub>2</sub>)**

This compound was prepared in a manner analogous to that of L<sup>7</sup>H<sub>2</sub>·(PF<sub>6</sub>)<sub>2</sub>, only 1,3-dibromopropane (10.740 g, 53.2 mmol) was used instead of 1,2-dibromoethane. Yield: 2.402 g (81%). M.p.: 112-114 °C. Anal. Calcd for C<sub>27</sub>H<sub>34</sub>O<sub>2</sub>N<sub>4</sub>P<sub>2</sub>F<sub>12</sub>: C, 44.03; H, 4.65; N, 7.60%. Found: C, 44.32; H, 4.81; N, 7.52%. <sup>1</sup>H NMR (400 MHz, DMSO-d<sub>6</sub>): δ 1.40 (t, *J* = 7.2 Hz, 6H, CH<sub>3</sub>), 2.22 (m, 2H, CH<sub>2</sub>), 4.19 (m, 8H, OCH<sub>2</sub>), 5.34 (s, 4H, PhCH<sub>2</sub>), 7.03 (t, *J* = 7.6 Hz, 2H, ArH), 7.09 (d, *J* = 8.4 Hz, 2H, ArH), 7.39 (t, *J* = 8.2 Hz, 2H, ArH), 7.43 (d, *J* = 7.6 Hz, 2H, ArH), 7.67 (s, 2H, ArH), 7.77 (s, 2H, imiH), 9.14 (s, 2H, 2-imiH). <sup>13</sup>C{<sup>1</sup>H} NMR (100 MHz, DMSO-d<sub>6</sub>): δ 15.1 (CH<sub>3</sub>), 28.4 (CH<sub>2</sub>), 44.2 (CH<sub>2</sub>), 48.0 (CH<sub>2</sub>), 64.5 (CH<sub>2</sub>), 111.9 (PhC), 120.7 (PhC), 122.1 (PhC), 122.7 (PhC), 130.4 (imiC or PhC), 130.8 (imiC or PhC), 135.7 (2-imiC), 156.3 (PhC).

**Preparation of [L<sup>1</sup>Hg(DMSO)](HgI<sub>4</sub>) (3)**

This compound was prepared in a manner analogous to that of complex **2**, only L<sup>1</sup>H<sub>2</sub>·Cl<sub>2</sub> (0.189 g, 0.3 mmol) and HgI<sub>2</sub> (0.272 g, 0.6 mmol) were used instead of L<sup>5</sup>H<sub>2</sub>·Cl<sub>2</sub> (0.197 g, 0.3 mmol) and HgCl<sub>2</sub> (0.163 g, 0.6 mmol) in CH<sub>3</sub>CN/DMSO solution (15 mL, 2:1, v/v) at about 80 °C. Yield: 0.091 g (19%). Mp: 242-244 °C. Anal. Calcd for C<sub>38</sub>H<sub>44</sub>Hg<sub>2</sub>I<sub>4</sub>N<sub>4</sub>O<sub>3</sub>S: C, 29.52; H, 2.86; N, 3.62%. Found: C, 29.21; H, 2.64; N, 3.55%. <sup>1</sup>H NMR (400 MHz, DMSO-d<sub>6</sub>): δ 0.82 (d, *J* = 6.4 Hz, 6H, CH<sub>3</sub>), 2.08 (q, *J* = 4.6 Hz, 4H,

$CH_2$ ), 4.03 (s, 4H,  $CH_2$ ), 4.29 (s, 4H,  $OCH_2$ ), 5.62 (s, 4H,  $CH_2$ ), 7.00 (q,  $J = 6.7$  Hz, 4H,  $ArH$ ), 7.27 (d,  $J = 8.4$  Hz, 2H,  $ArH$ ), 7.41 (q,  $J = 9.4$  Hz, 6H,  $ArH$ ), 7.84 (m, 4H,  $ArH$ ).  $^{13}C\{^1H\}$  NMR (100 MHz,  $DMSO-d_6$ ):  $\delta$  12.7 ( $CH_3$ ), 24.8 ( $CH_2$ ), 48.9 ( $CH_2$ ), 51.4 ( $CH_2$ ), 65.1 ( $CH_2$ ), 112.8 (bimiC), 113.0 (bimiC), 121.1 (bimiC or PhC), 124.4 (bimiC or PhC), 130.3 (bimiC or PhC), 133.5 (bimiC or PhC), 134.1 (PhC), 156.5 (PhC), 188.5 ( $C_{carbene}$ ).

#### Preparation of $[L^6Hg(Hg_2I_6)]$ (4)

This compound was prepared in a manner analogous to that of complex **2**, only  $L^6H_2 \cdot Cl_2$  (0.184 g, 0.3 mmol) and  $HgI_2$  (0.408 g, 0.9 mmol) were used instead of  $L^5H_2 \cdot Cl_2$  (0.197 g, 0.3 mmol) and  $HgCl_2$  (0.163 g, 0.6 mmol). Yield: 0.353 g (61%). M.p.: 168-170 °C. Anal. Calcd for  $C_{35}H_{32}Hg_3I_6N_4O_2$ : C, 22.08; H, 1.69; N, 2.94%. Found: C, 22.43; H, 1.71; N, 2.72%.  $^1H$  NMR (400 MHz,  $DMSO-d_6$ ):  $\delta$  5.24 (s, 4H,  $CH_2$ ), 5.69 (s, 2H,  $OCH_2$ ), 5.79 (s, 4H,  $PhCH_2$ ), 7.08 (t,  $J = 3.0$  Hz, 4H,  $ArH$ ), 7.20 (d,  $J = 9.2$  Hz, 6H,  $ArH$ ), 7.45 (t,  $J = 7.2$  Hz, 4H,  $ArH$ ), 7.65 (q,  $J = 14.1$  Hz, 8H,  $ArH$ ).  $^{13}C\{^1H\}$  NMR (100 MHz,  $DMSO-d_6$ ):  $\delta$  51.7 ( $CH_2$ ), 53.9 ( $CH_2$ ), 92.9 ( $CH_2$ ), 114.5 (PhC), 122.8 (PhC), 123.9 (PhC), 124.1 (PhC), 125.1 (PhC), 127.6 (PhC), 128.3 (PhC), 129.0 (PhC), 131.1 (imiC or PhC), 131.8 (imiC or PhC), 136.7 (PhC), 153.8 (PhC), 177.4 ( $C_{carbene}$ ).

#### Preparation of $[L^8Hg_2Cl_2](Hg_3Cl_8)$ (5)

This compound was prepared in a manner analogous to that of complex **2**, only  $L^8H_2 \cdot (PF_6)_2$  (0.220 g, 0.3 mmol) and  $HgCl_2$  (0.407 g, 1.5 mmol) were used instead of  $L^5H_2 \cdot Cl_2$  (0.197 g, 0.3 mmol) and  $HgCl_2$  (0.163 g, 0.6 mmol). Yield: 0.310 g (57%). M.p.: 188-190 °C. Anal. Calcd for  $C_{27}H_{32}Cl_{10}Hg_5N_4O_2$ : C, 17.99; H, 1.78; N, 3.10%. Found: C, 18.24; H, 1.53; N, 3.43%.  $^1H$  NMR (400 MHz,  $DMSO-d_6$ ):  $\delta$  1.39 (t,  $J = 3.5$  Hz, 6H,  $CH_3$ ), 2.22 (t,  $J = 5.7$  Hz, 2H,  $CH_2$ ), 4.18 (t,  $J = 7.6$  Hz, 4H,  $OCH_2$ ), 4.29 (q,  $J = 9.3$  Hz, 4H,  $CH_2$ ), 5.50 (t, 4H,  $PhCH_2$ ), 7.08 (m, 4H,  $ArH$ ), 7.40 (m, 4H,  $ArH$ ), 7.76 (q,  $J = 12.6$  Hz, 4H,  $ArH$ ).  $^{13}C\{^1H\}$  NMR (100 MHz,  $DMSO-d_6$ ):  $\delta$  17.6 ( $CH_3$ ), 29.8 ( $CH_2$ ), 47.2 ( $CH_2$ ), 50.8 ( $CH_2$ ), 65.7 ( $CH_2$ ), 109.9 (PhC), 123.1 (PhC), 123.2 (PhC), 123.8 (PhC), 123.9 (PhC), 125.1 (PhC), 131.0 (imiC), 157.1 (PhC), 167.6 ( $C_{carbene}$ ).

### Preparation of [L<sup>7</sup>Ag<sub>2</sub>](PF<sub>6</sub>)<sub>2</sub> (7)

Silver oxide (0.034 g, 0.15 mmol) was added to a CH<sub>3</sub>CN/CH<sub>2</sub>Cl<sub>2</sub> (15 mL, 2:1, v/v) solution of precursor L<sup>7</sup>H<sub>2</sub>·(PF<sub>6</sub>)<sub>2</sub> (0.216 g, 0.3 mmol), and the suspension solution was stirred for 24 hours under refluxing. The resulting solution was filtered and concentrated to 10 mL, and Et<sub>2</sub>O (5 mL) was added to precipitate a yellow powder. Isolation by filtration yields complex 7. Yield: 0.136 g (66%). M.p.: 182-184 °C. Anal. Calcd for C<sub>26</sub>H<sub>30</sub>AgF<sub>6</sub>N<sub>4</sub>O<sub>2</sub>P: C, 45.69; H, 4.42; N, 8.19%. Found: C, 45.33; H, 4.52; N, 8.54%. <sup>1</sup>H NMR (400 MHz, DMSO-d<sub>6</sub>): δ 1.40 (t, *J* = 10.0 Hz, 12H, CH<sub>3</sub>), 4.14 (q, *J* = 6.9 Hz, 8H, CH<sub>2</sub>), 4.26 (s, 4H, OCH<sub>2</sub>), 4.44 (s, 4H, OCH<sub>2</sub>), 5.33 (d, *J* = 12.0 Hz, 8H, PhCH<sub>2</sub>), 7.08 (m, 8H, ArH), 7.48 (m, 16H, ArH). <sup>13</sup>C{<sup>1</sup>H} NMR (100 MHz, DMSO-d<sub>6</sub>): δ 18.6 (CH<sub>3</sub>), 47.3 (CH<sub>2</sub>), 51.6 (CH<sub>2</sub>), 67.1 (CH<sub>2</sub>), 112.4 (PhC), 121.2 (PhC), 122.0 (PhC), 123.1 (PhC), 125.1 (PhC), 130.4 (bimiC or PhC), 131.1 (bimiC or PhC), 143.5 (PhC), 156.4 (PhC). The carbene carbon was not observed.

### Preparation of [L<sup>3</sup>Ag<sub>2</sub>Cl<sub>2</sub>]<sub>2</sub> (8)

This compound was prepared in a manner analogous to that of complex 7, only L<sup>7</sup>H<sub>2</sub>·(PF<sub>6</sub>)<sub>2</sub> (0.218 g, 0.3 mmol) and silver oxide (0.069 g, 0.3 mmol) were used instead of L<sup>7</sup>H<sub>2</sub>·(PF<sub>6</sub>)<sub>2</sub> (0.216 g, 0.3 mmol) and silver oxide (0.034 g, 0.15 mmol). Yield: 0.131 g (46%). Mp.: 254-256 °C. Anal. Calcd for C<sub>42</sub>H<sub>36</sub>Ag<sub>2</sub>Cl<sub>2</sub>N<sub>6</sub>O<sub>2</sub>: C, 53.47; H, 3.84; N, 8.90%. Found: C, 53.52; H, 3.75; N, 8.67%. <sup>1</sup>H NMR (400 MHz, DMSO-d<sub>6</sub>): δ 4.29 (s, 8H, OCH<sub>2</sub>), 5.78 (d, *J* = 8.0 Hz, 8H, CH<sub>2</sub>), 5.86 (s, 8H, CH<sub>2</sub>), 7.01 (t, *J* = 7.2 Hz, 8H, ArH), 7.29 (m, 4H, ArH), 7.37 (m, 16H, ArH), 7.74 (q, *J* = 7.4 Hz, 16H, ArH), 8.38 (d, *J* = 4.4 Hz, 4H, ArH). <sup>13</sup>C{<sup>1</sup>H} NMR (100 MHz, DMSO-d<sub>6</sub>): δ 46.2 (CH<sub>2</sub>), 50.6 (CH<sub>2</sub>), 66.2 (CH<sub>2</sub>), 112.3 (PhC), 113.7 (bimiC), 113.8 (bimiC), 120.9 (bimiC or PhC), 121.3 (bimiC or PhC), 122.6 (PhC or PyC), 123.4 (PhC or PyC), 126.3 (PhC), 126.5 (PhC), 130.8 (bimiC or PhC), 130.9 (bimiC or PhC), 131.1 (PyC), 137.4 (PyC), 143.4 (PhC or PyC), 149.3 (PyC), 152.8 (PyC), 156.4 (PhC). The carbene carbon was not observed.

6. The  $^1\text{H}$  NMR and  $^{13}\text{C}\{^1\text{H}\}$  NMR spectra of precursors  $\text{L}^1\text{H}_2\cdot\text{Cl}_2$ ,  $\text{L}^7\text{H}_2\cdot(\text{PF}_6)_2$  and  $\text{L}^8\text{H}_2\cdot(\text{PF}_6)_2$  and complexes 1-8

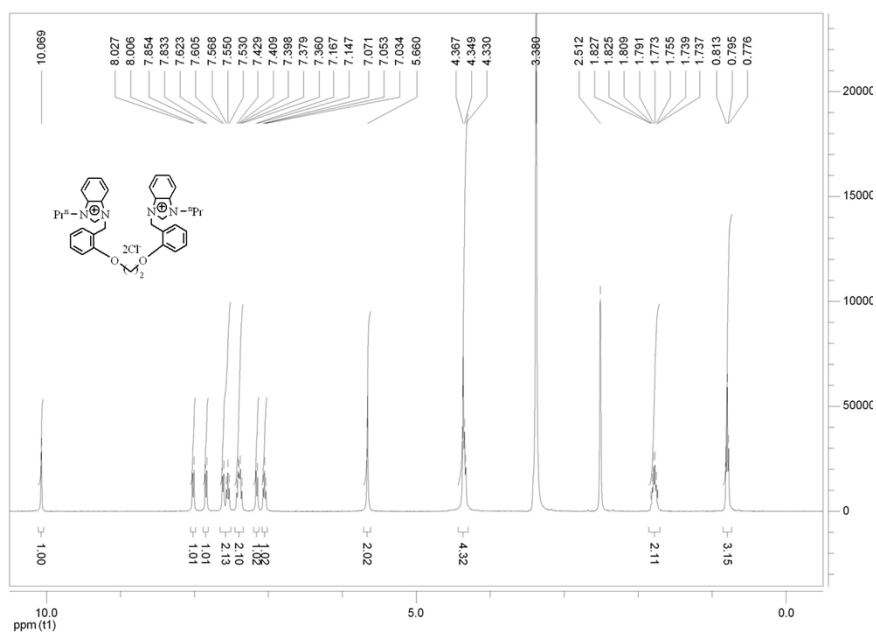

Fig. S16 The  $^1\text{H}$  NMR (400 MHz,  $\text{DMSO-d}_6$ ) spectra of  $\text{L}^1\text{H}_2\cdot\text{Cl}_2$ .

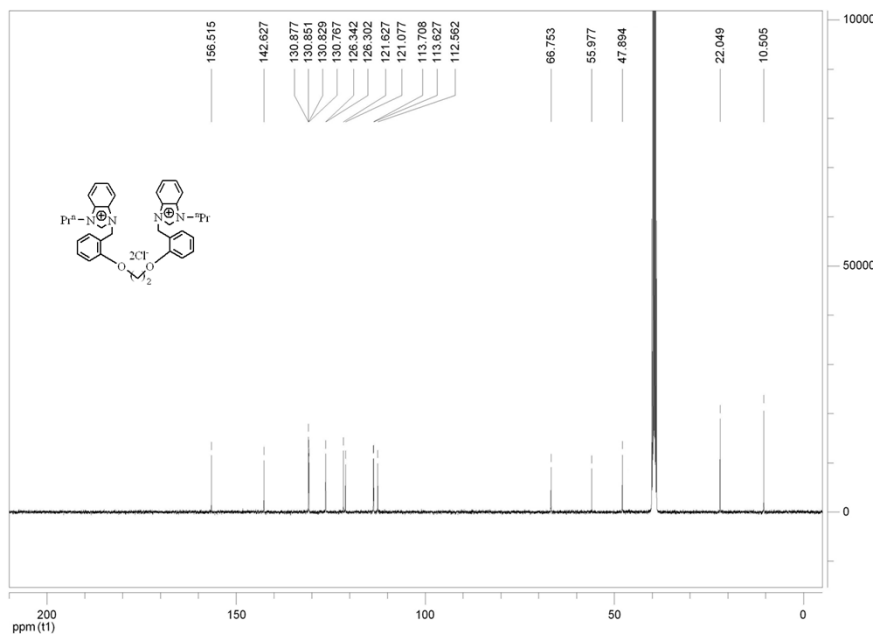

Fig. S17 The  $^{13}\text{C}$  NMR (100 MHz,  $\text{DMSO-d}_6$ ) spectra of  $\text{L}^1\text{H}_2\cdot\text{Cl}_2$ .

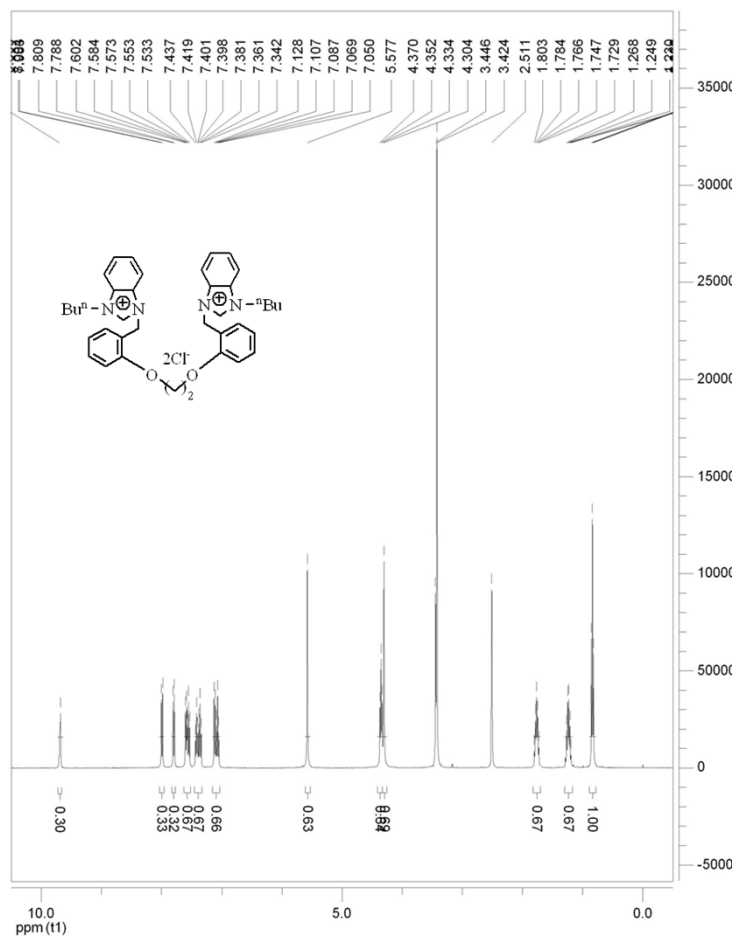

**Fig. S18** The  $^1H$  NMR (400 MHz, DMSO- $d_6$ ) spectra of  $L^2H_2 \cdot Cl_2$ .

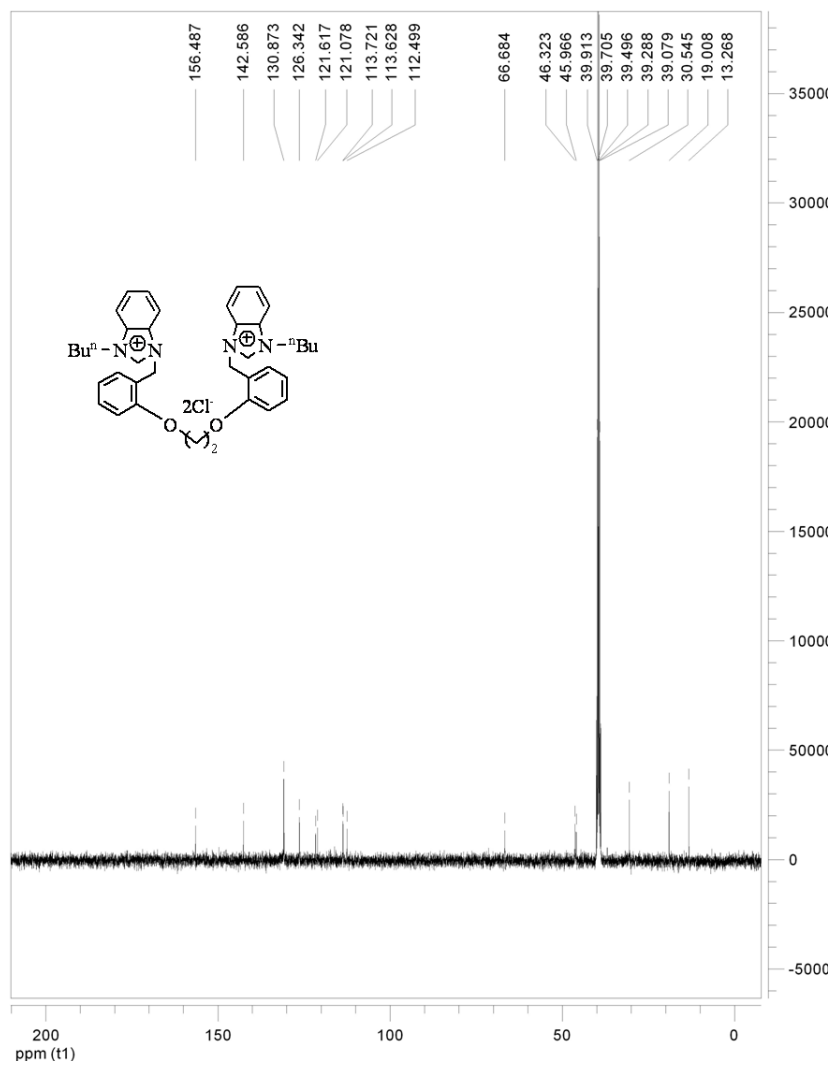

**Fig. S19** The  $^{13}\text{C}$  NMR (100 MHz,  $\text{DMSO-d}_6$ ) spectra of  $\text{L}^2\text{H}_2 \cdot \text{Cl}_2$ .

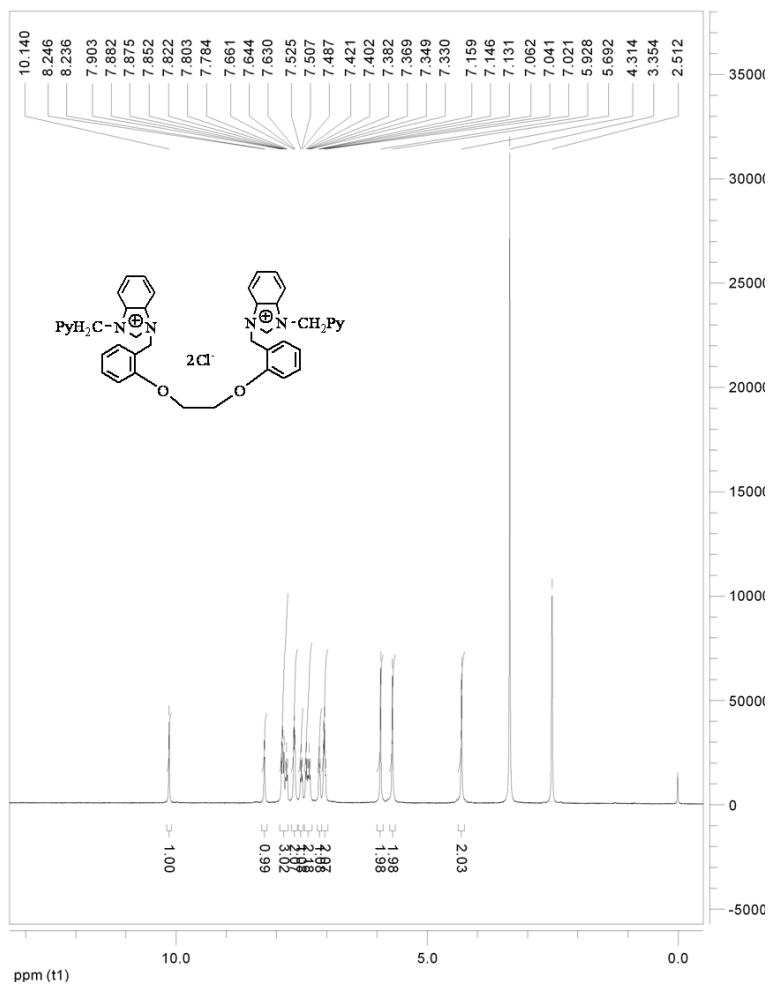

**Fig. S20** The  $^1H$  NMR (400 MHz, DMSO- $d_6$ ) spectra of  $L^3H_2 \cdot Cl_2$ .

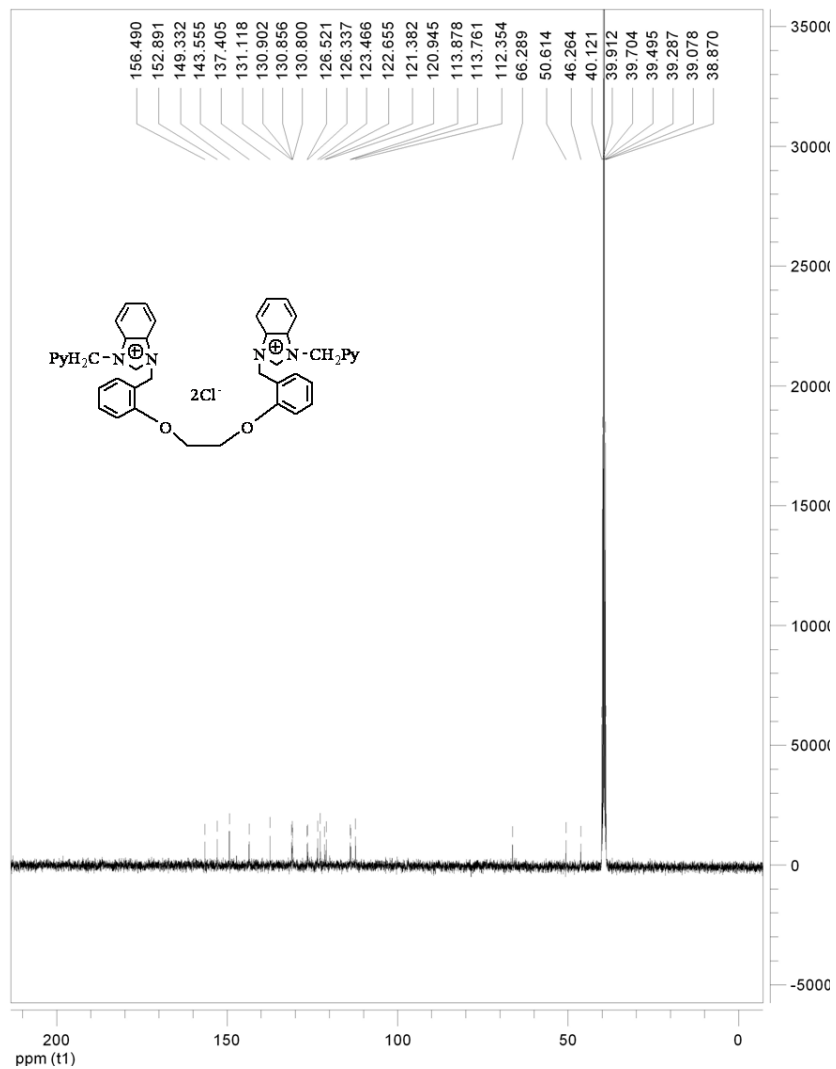

**Fig. S21** The  $^{13}C$  NMR (100 MHz, DMSO- $d_6$ ) spectra of  $L^3H_2 \cdot Cl_2$ .



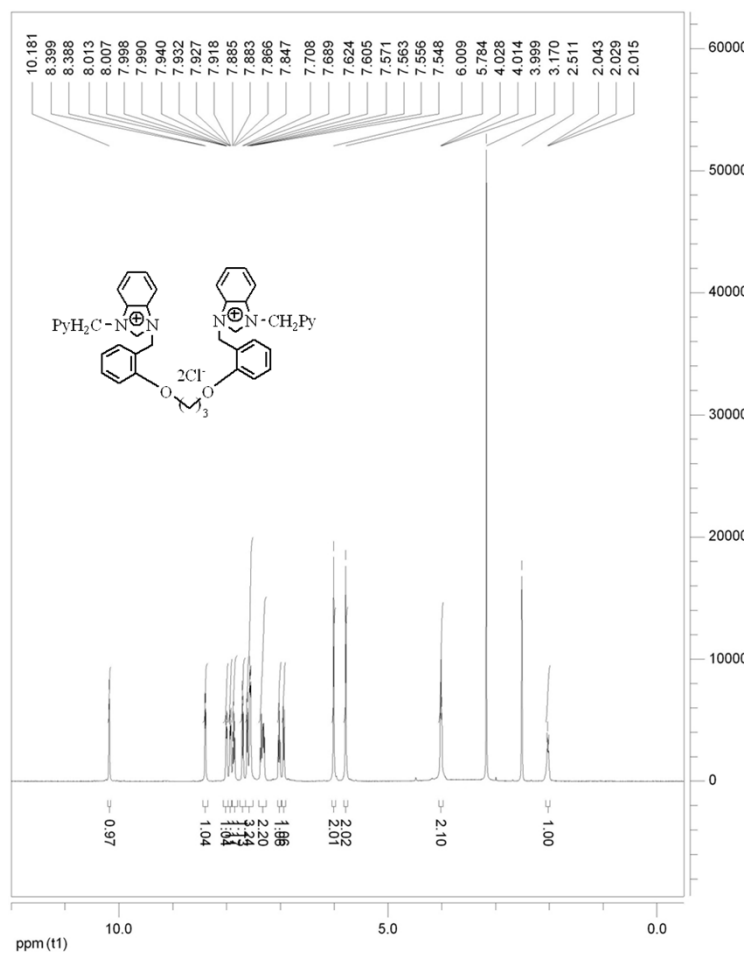

**Fig. S22** The  $^1H$  NMR (400 MHz, DMSO- $d_6$ ) spectra of  $L^4H_2 \cdot Cl_2$ .

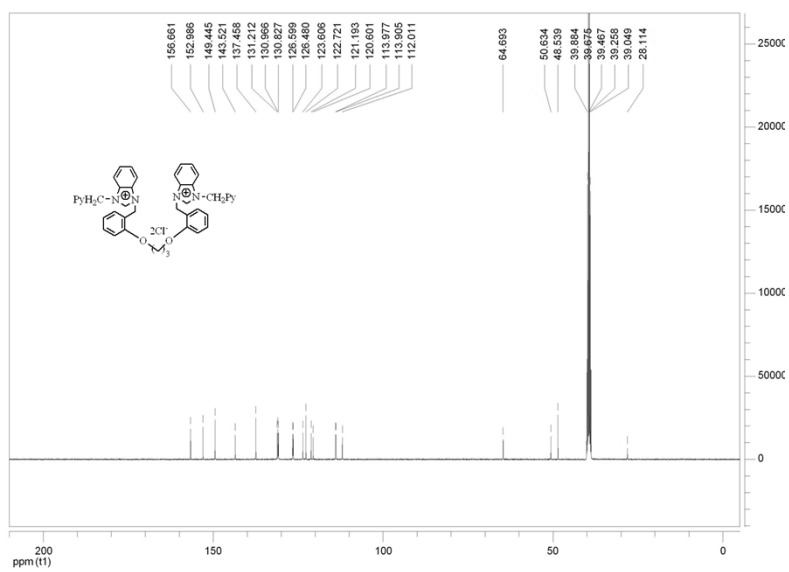

**Fig. S23** The  $^{13}C$  NMR (100 MHz, DMSO- $d_6$ ) spectra of  $L^4H_2 \cdot Cl_2$ .

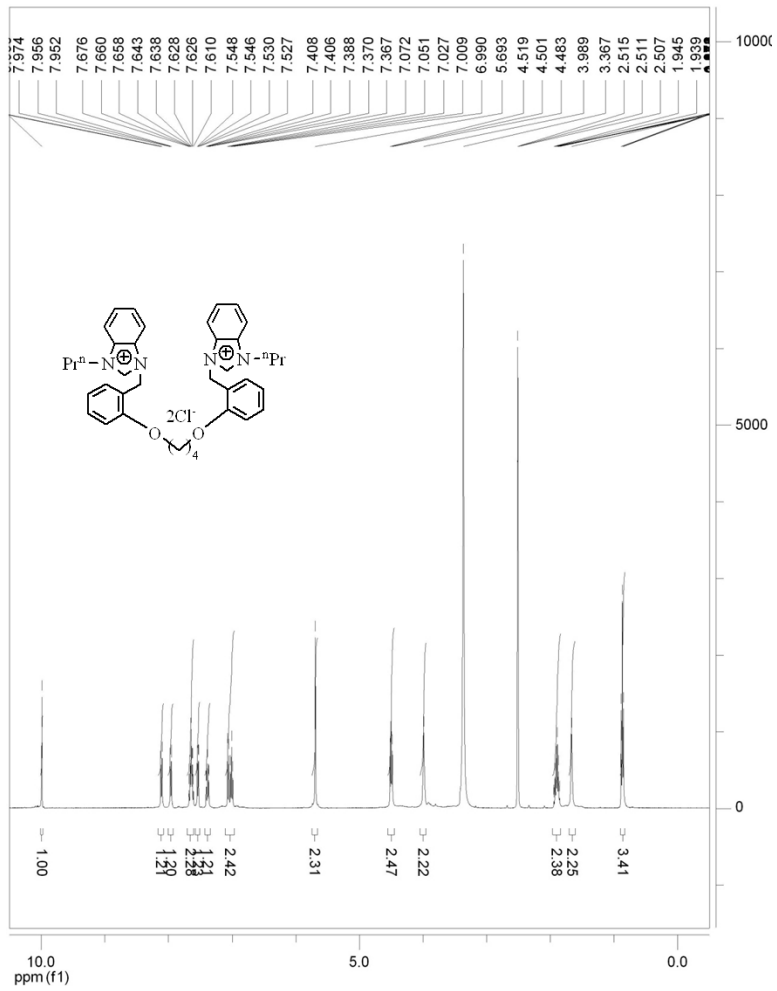

Fig. S24 The <sup>1</sup>H NMR (400 MHz, DMSO-d<sub>6</sub>) spectra of L<sup>5</sup>H<sub>2</sub>·Cl<sub>2</sub>.

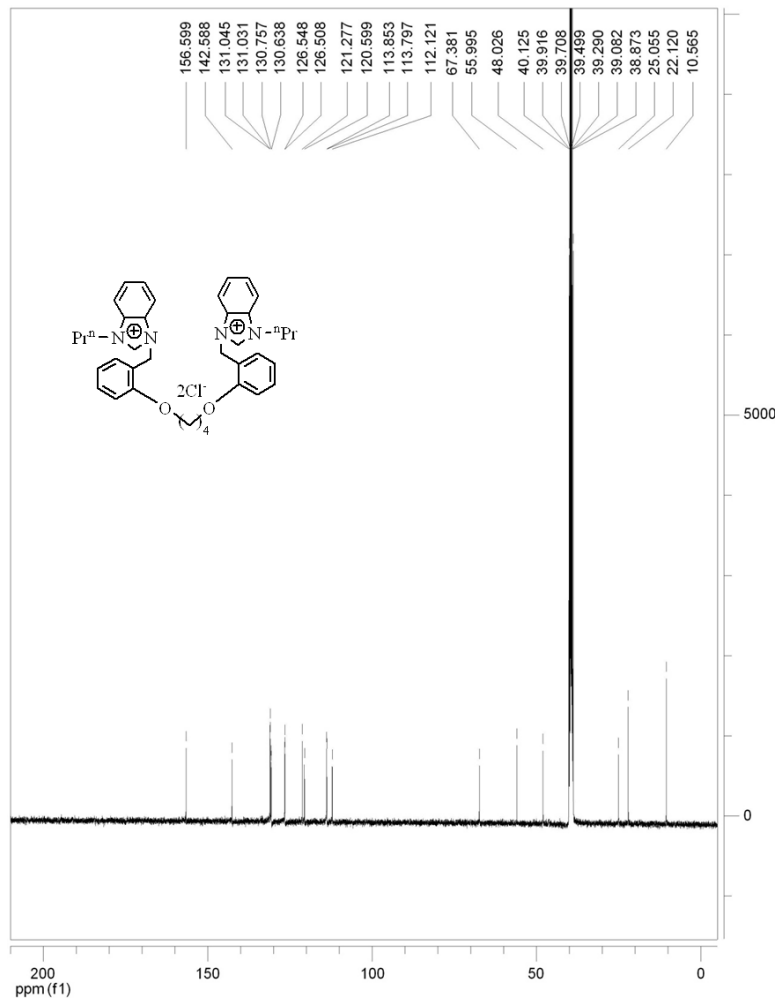

**Fig. S25** The  $^{13}C$  NMR (100 MHz, DMSO- $d_6$ ) spectra of  $L^5H_2 \cdot Cl_2$ .

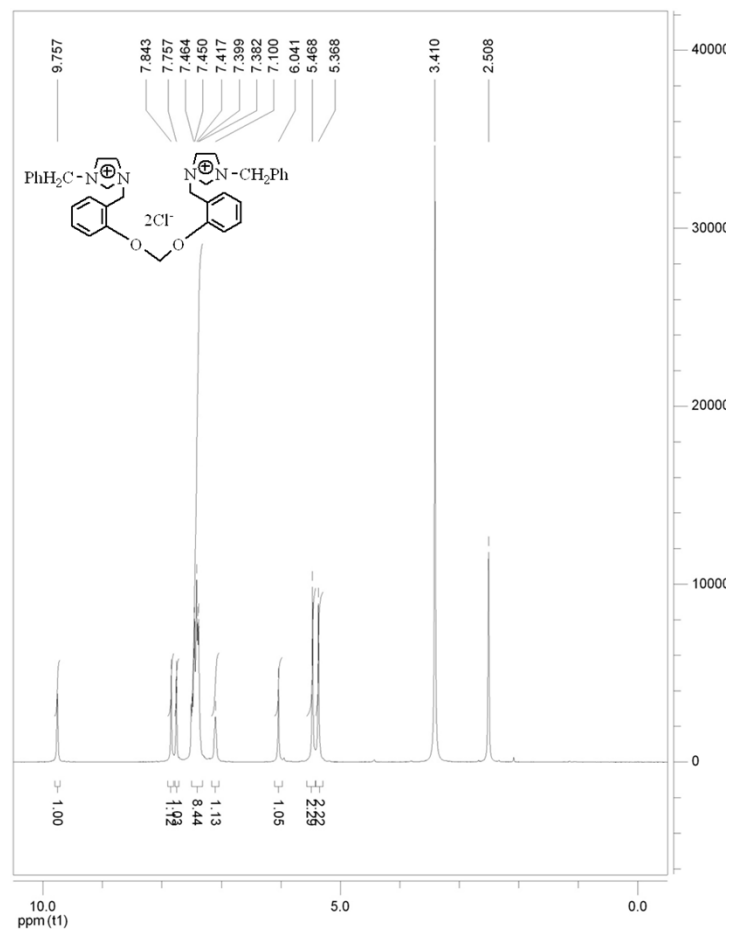

**Fig. S26** The  $^1H$  NMR (400 MHz,  $DMSO-d_6$ ) spectra of  $L^{6H_2} \cdot Cl_2$ .

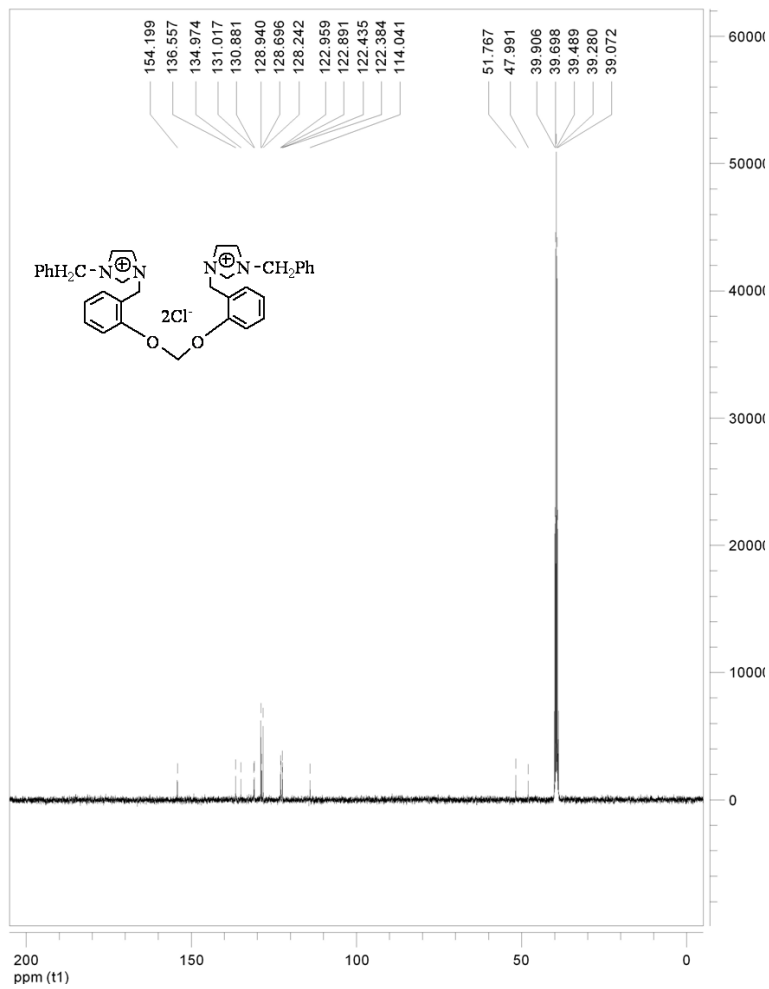

**Fig. S27** The  $^{13}C$  NMR (100 MHz, DMSO- $d_6$ ) spectra of  $L^{6H_2} \cdot Cl_2$ .

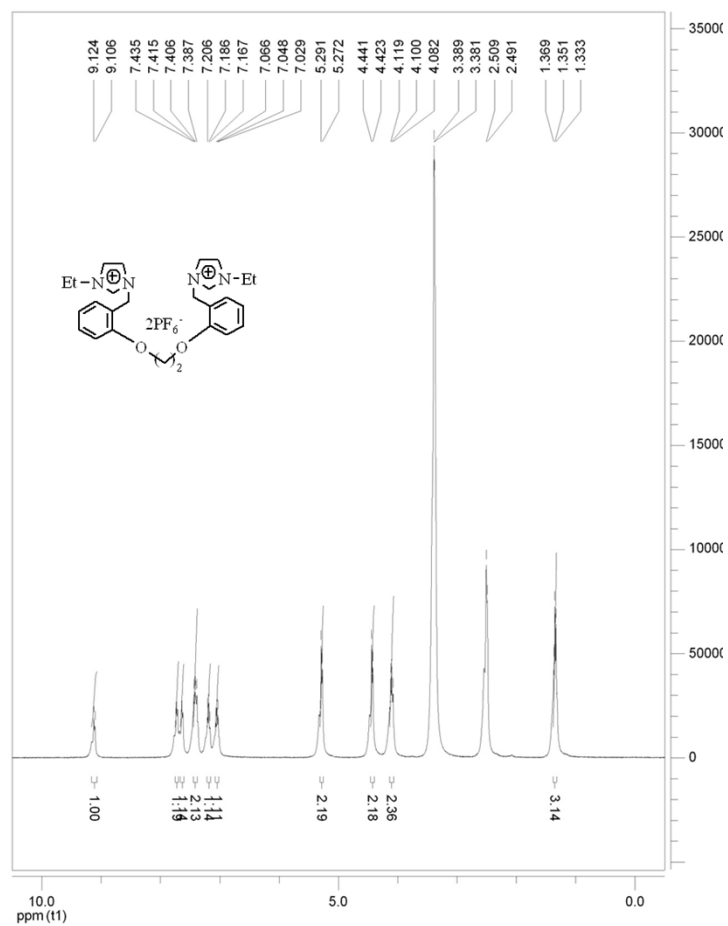

**Fig. S28** The  $^1H$  NMR (400 MHz, DMSO- $d_6$ ) spectra of  $L^7H_2 \cdot (PF_6)_2$ .

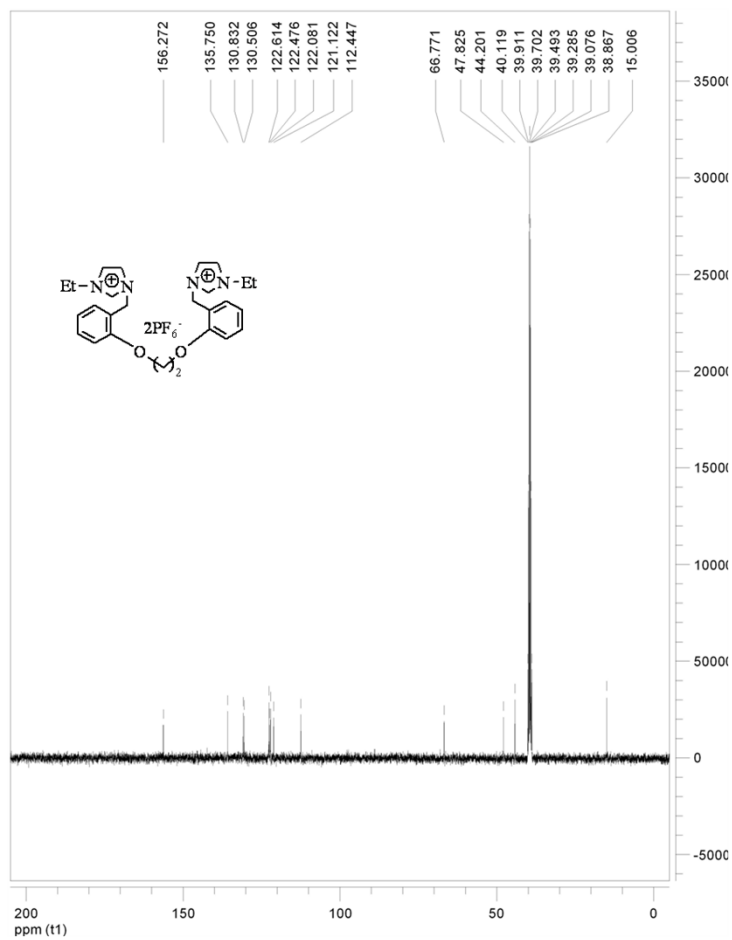

**Fig. S29** The  $^{13}C$  NMR (100 MHz, DMSO- $d_6$ ) spectra of  $L^7H_2 \cdot Cl_2$ .

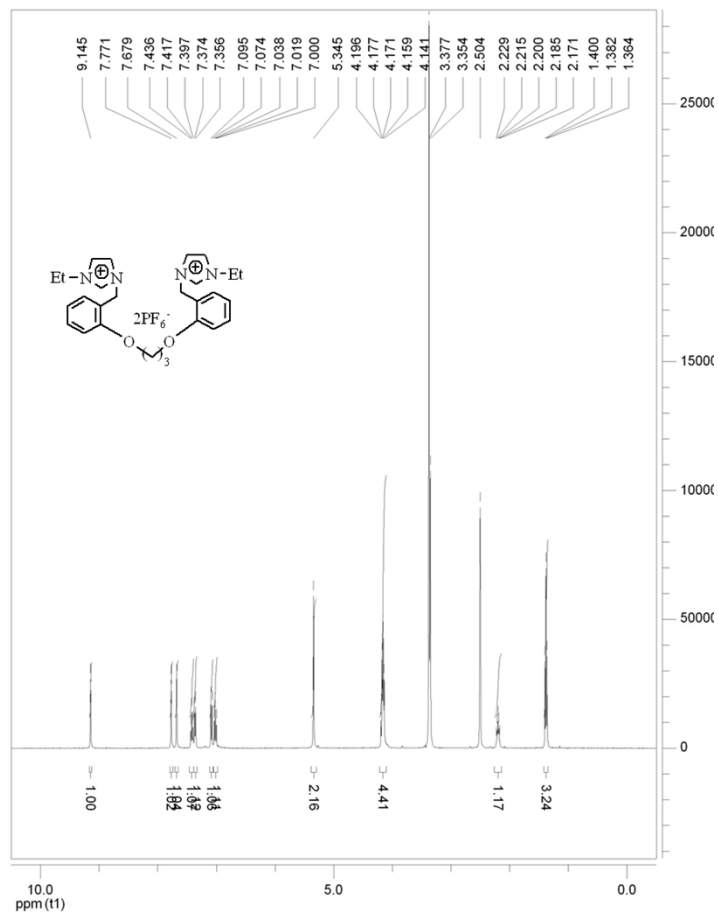

**Fig. S30** The  $^1H$  NMR (400 MHz, DMSO- $d_6$ ) spectra of  $L^8H_2 \cdot (PF_6)_2$ .



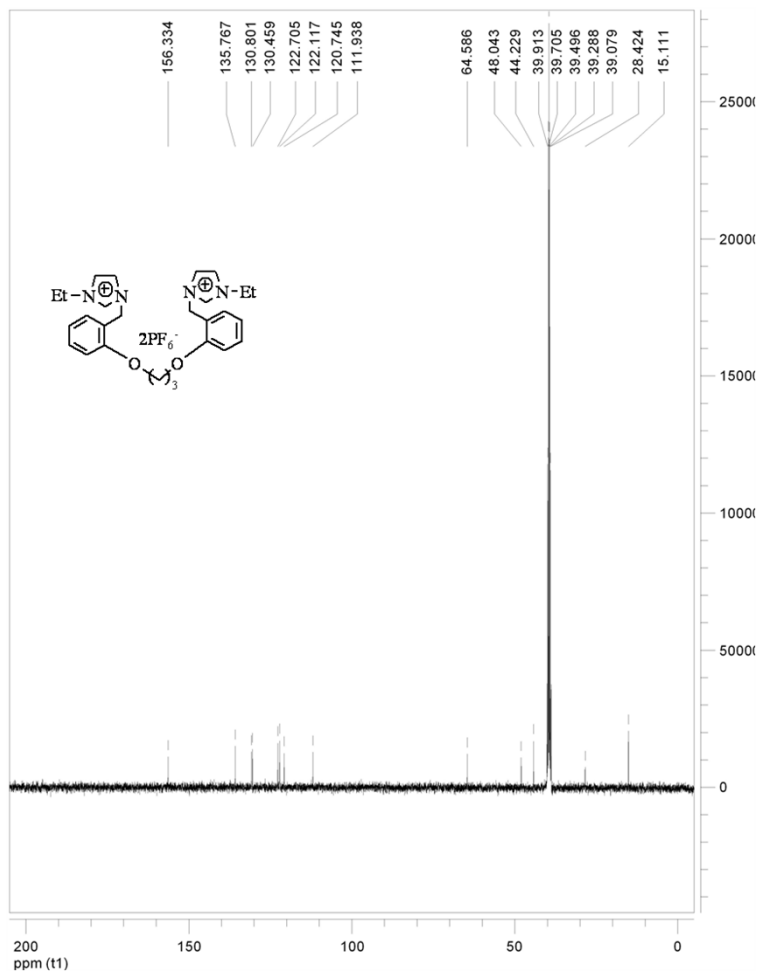

**Fig. S31** The  $^{13}C$  NMR (100 MHz, DMSO- $d_6$ ) spectra of  $L^8H_2 \cdot Cl_2$ .

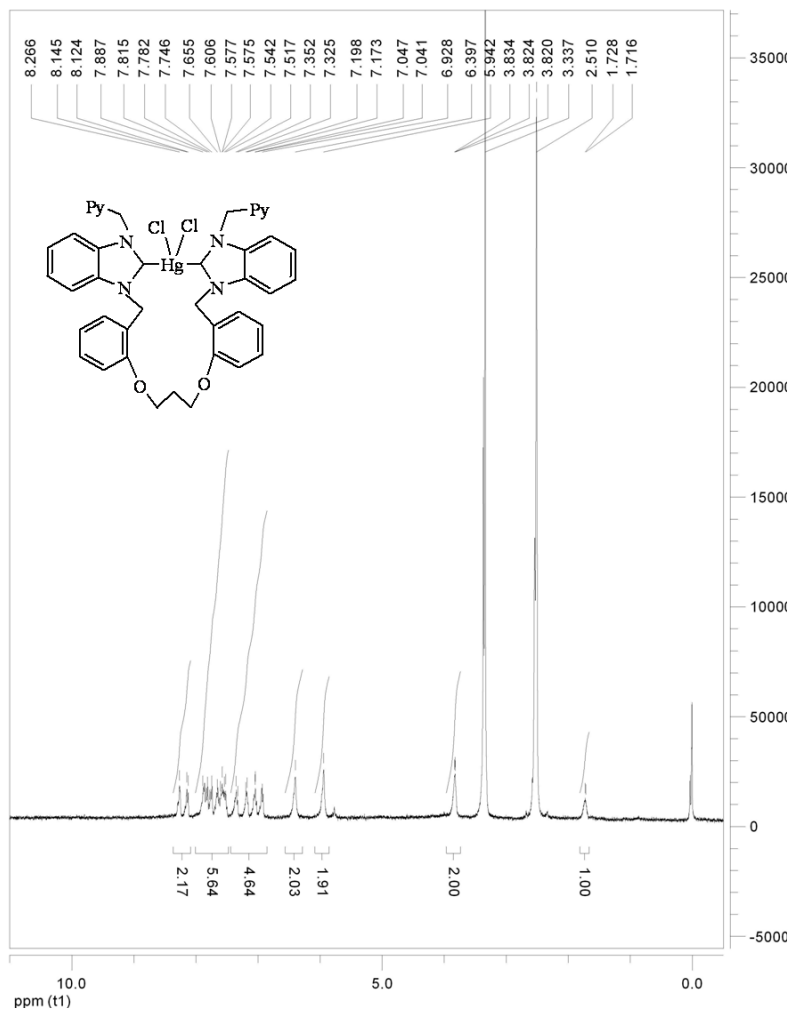

**Fig. S32** The  $^1\text{H}$  NMR (400 MHz,  $\text{DMSO-d}_6$ ) spectra of **1**.

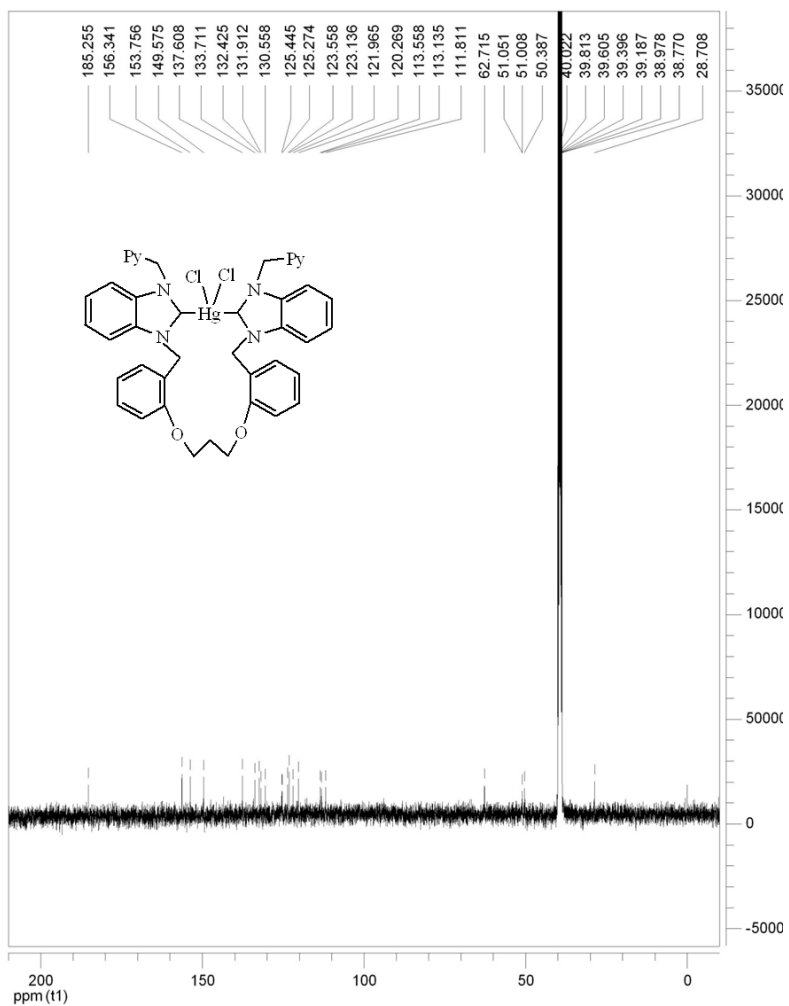

Fig. S33 The  $^{13}\text{C}$  NMR (100 MHz, DMSO- $d_6$ ) spectra of **1**.

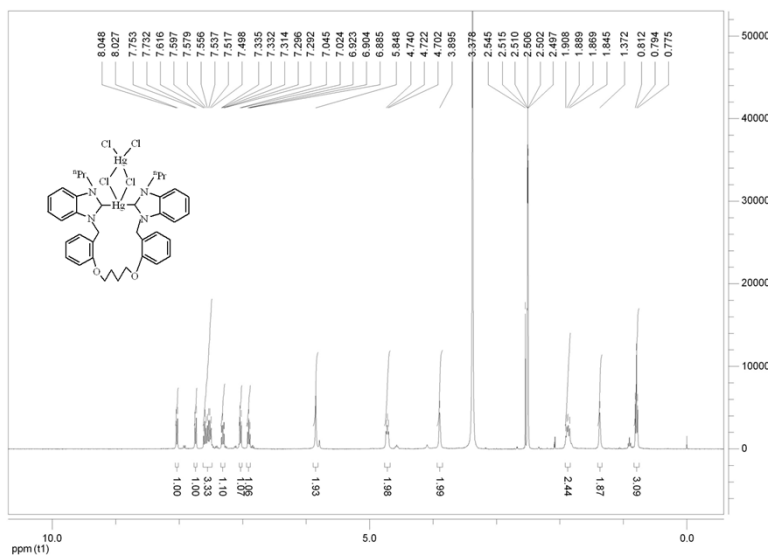

Fig. S34 The  $^1\text{H}$  NMR (400 MHz, DMSO- $d_6$ ) spectra of **2**.

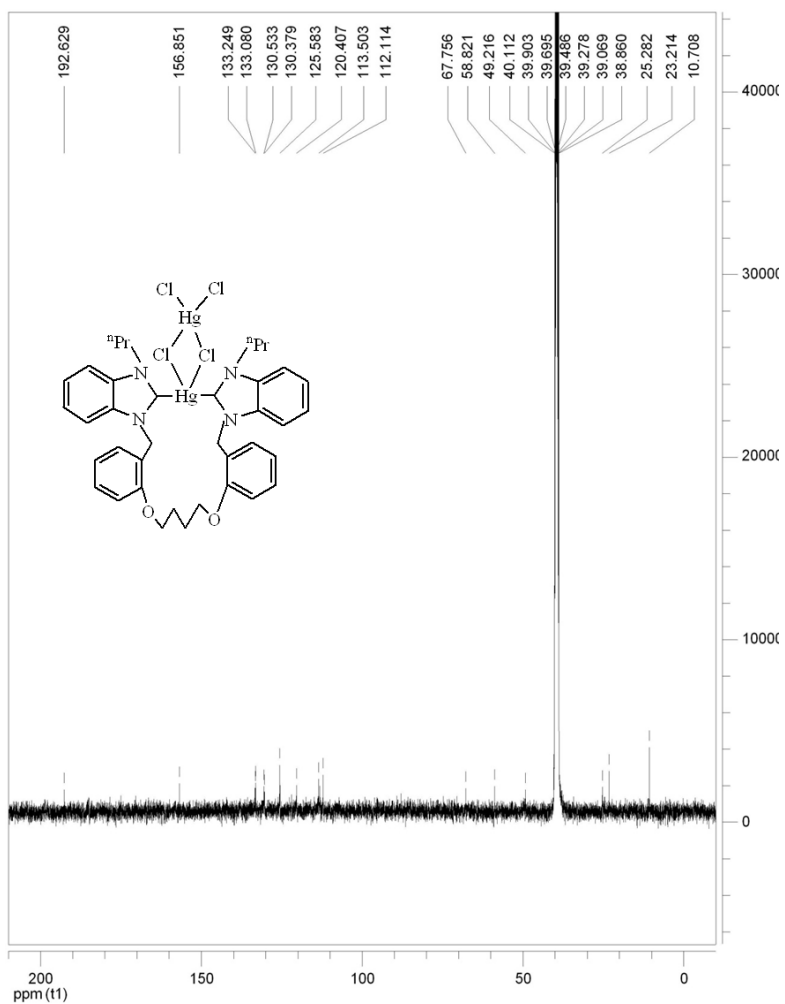

**Fig. S35** The  $^{13}\text{C}$  NMR (100 MHz,  $\text{DMSO-d}_6$ ) spectra of **2**.

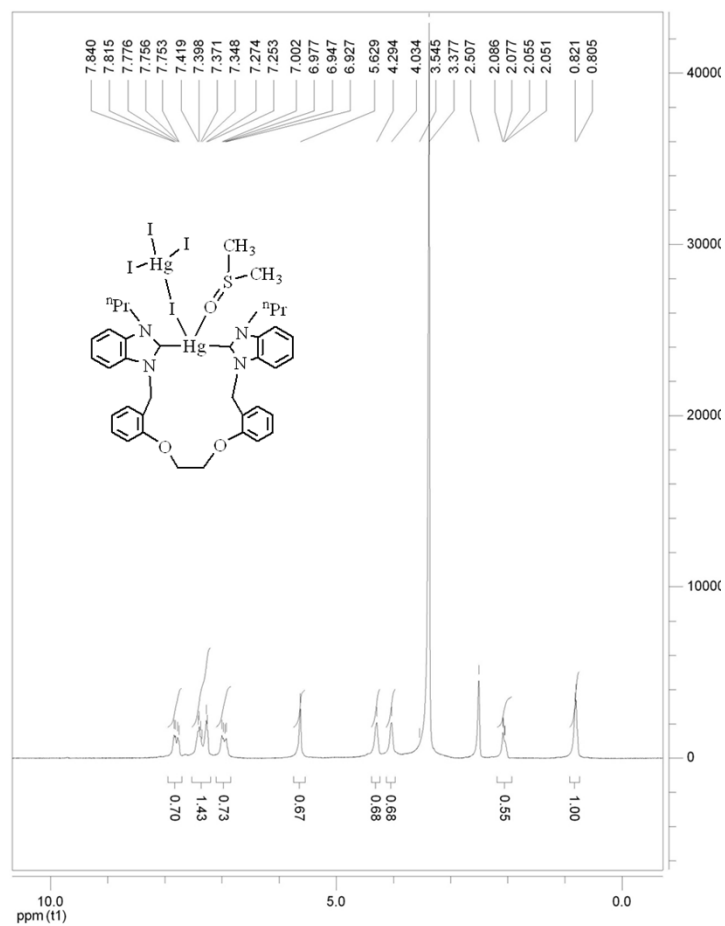

**Fig. S36** The  $^1\text{H}$  NMR (400 MHz,  $\text{DMSO-d}_6$ ) spectra of **3**.

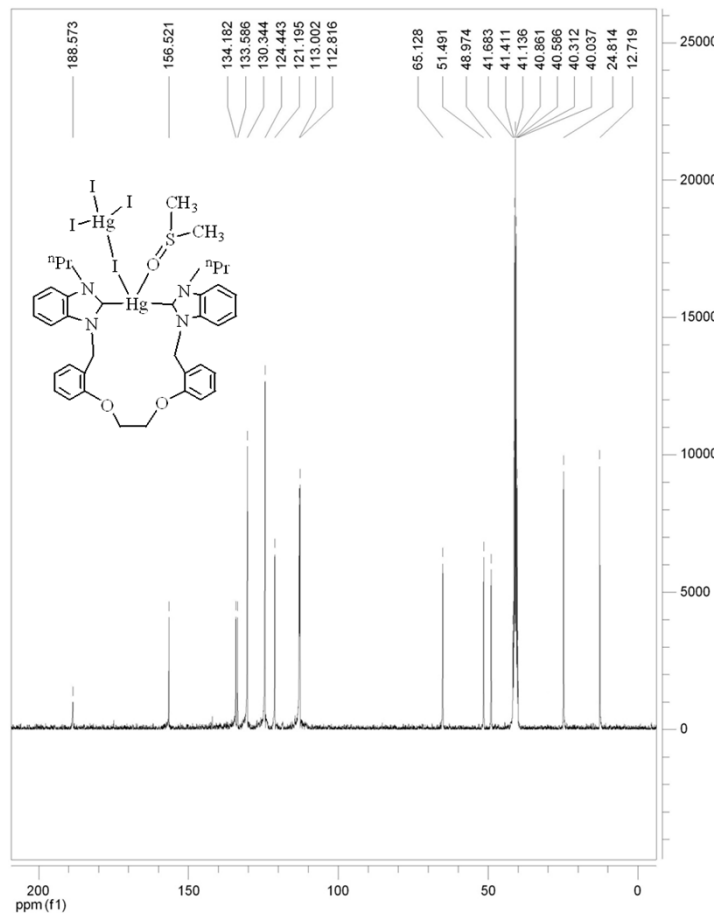

**Fig. S37** The  $^{13}\text{C}$  NMR (100 MHz, DMSO- $d_6$ ) spectra of **3**.

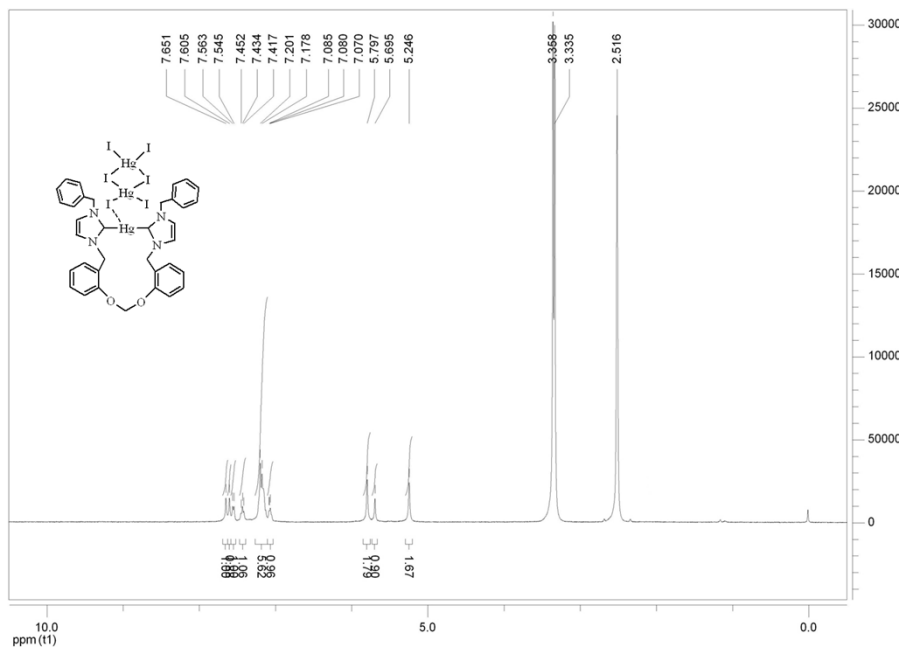

**Fig. S38** The  $^1\text{H}$  NMR (400 MHz, DMSO- $d_6$ ) spectra of **4**.

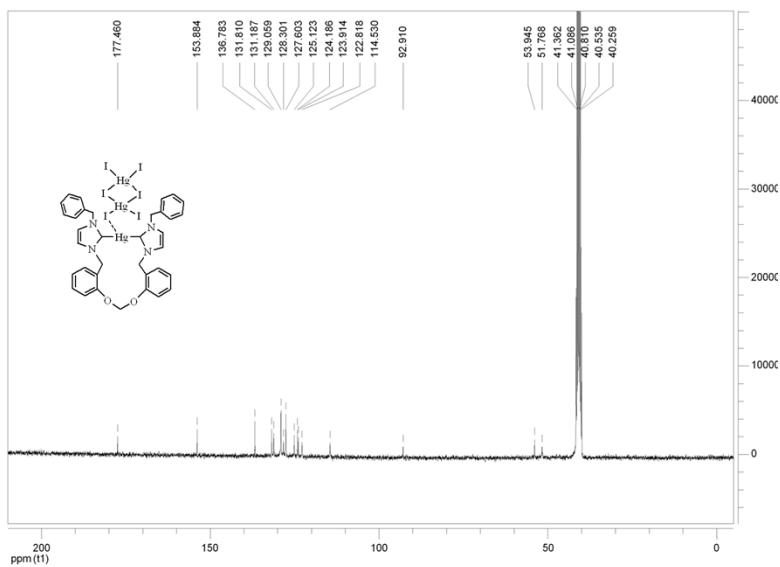

**Fig. S39** The  $^{13}\text{C}$  NMR (100 MHz,  $\text{DMSO-d}_6$ ) spectra of **4**.

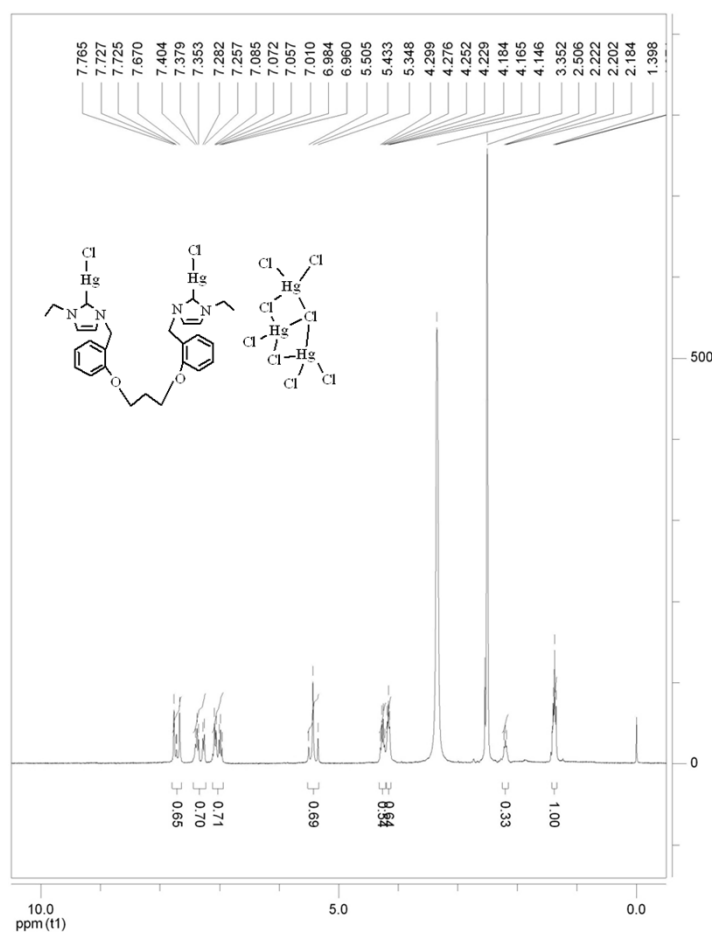

**Fig. S40** The  $^1\text{H}$  NMR (400 MHz,  $\text{DMSO-d}_6$ ) spectra of **5**.

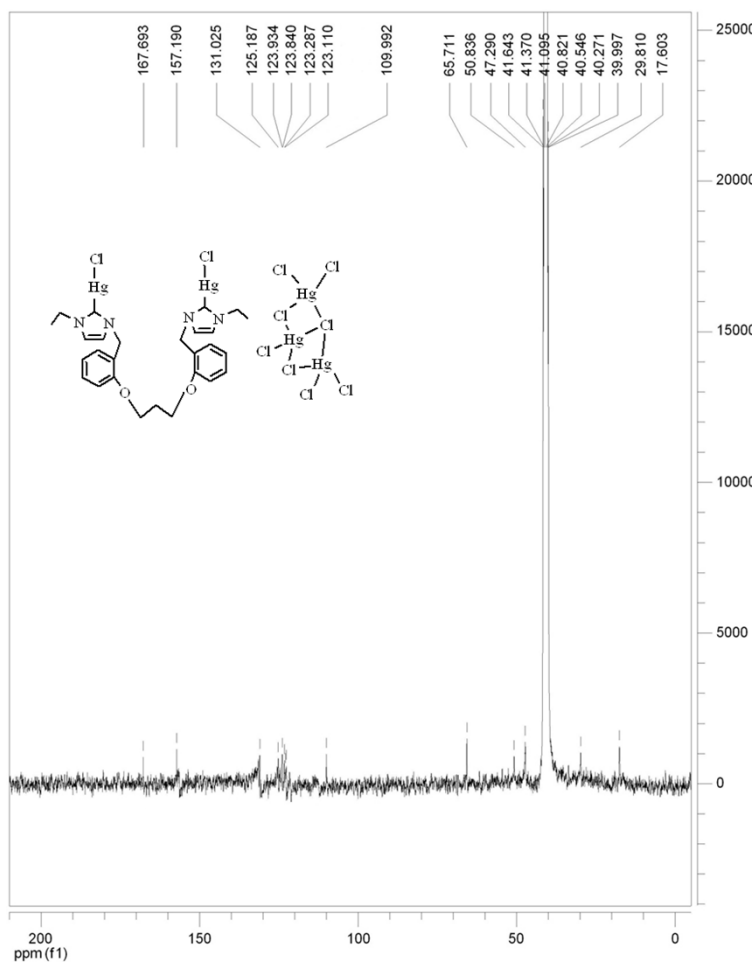

**Fig. S41** The  $^{13}\text{C}$  NMR (100 MHz,  $\text{DMSO-d}_6$ ) spectra of **5**.

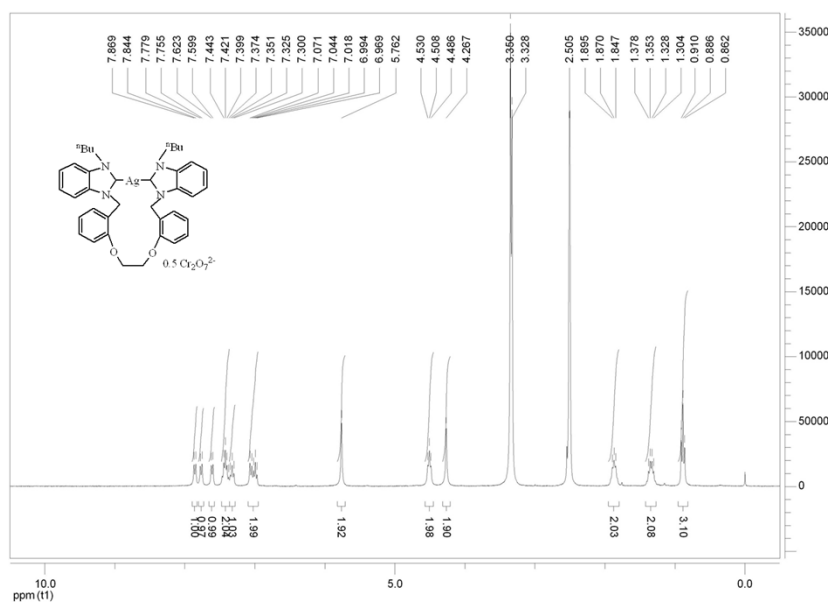

**Fig. S42** The  $^1\text{H}$  NMR (400 MHz,  $\text{DMSO-d}_6$ ) spectra of **6**.



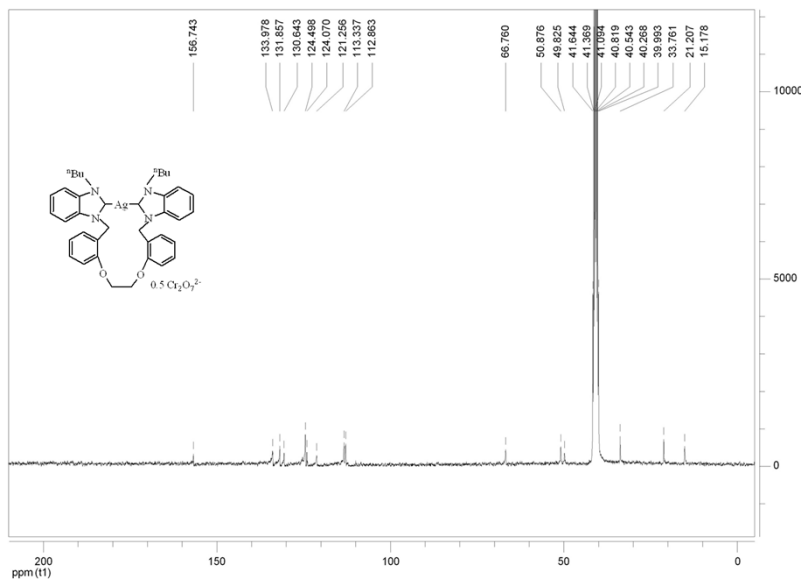

Fig. S43 The  $^{13}\text{C}$  NMR (100 MHz,  $\text{DMSO-d}_6$ ) spectra of 6.

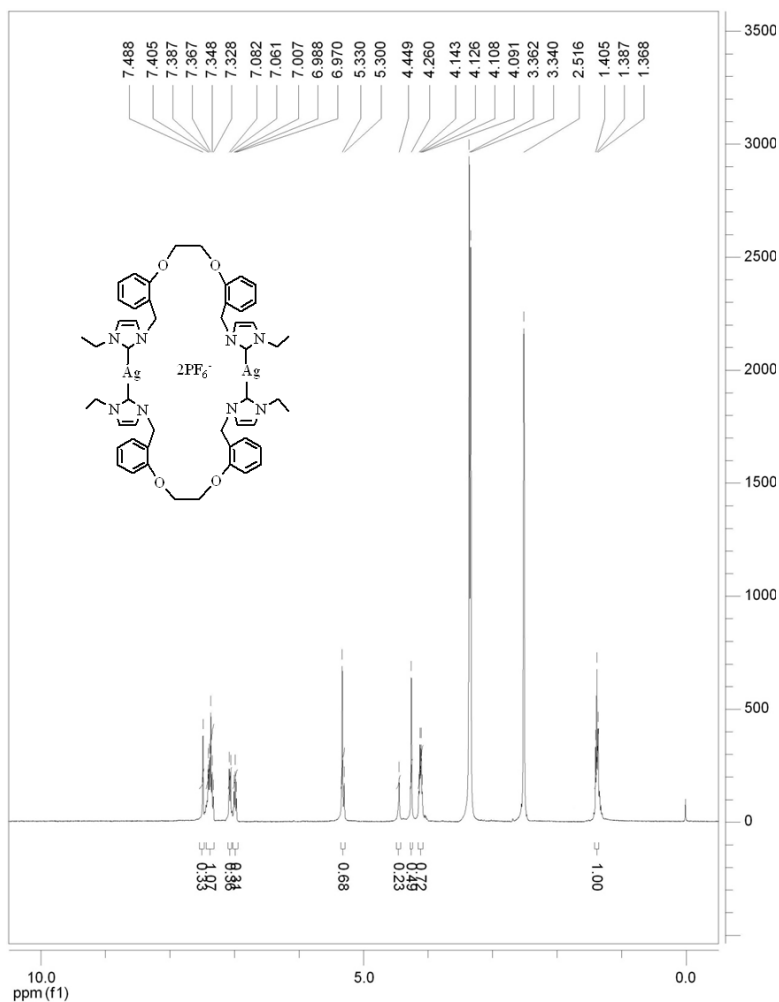

Fig. S44 The  $^1\text{H}$  NMR (400 MHz,  $\text{DMSO-d}_6$ ) spectra of 7.

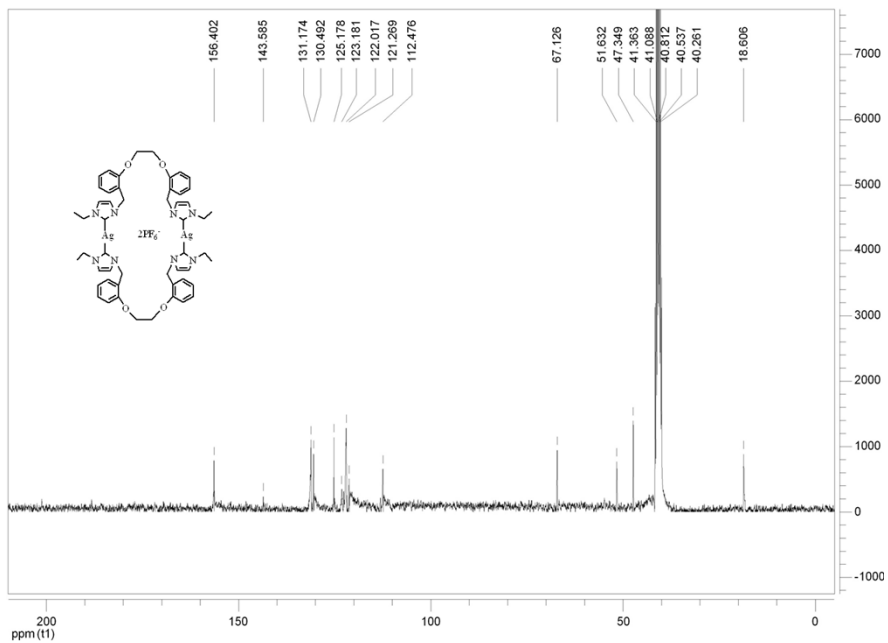

**Fig. S45** The  $^{13}\text{C}$  NMR (100 MHz,  $\text{DMSO-d}_6$ ) spectra of **7**.

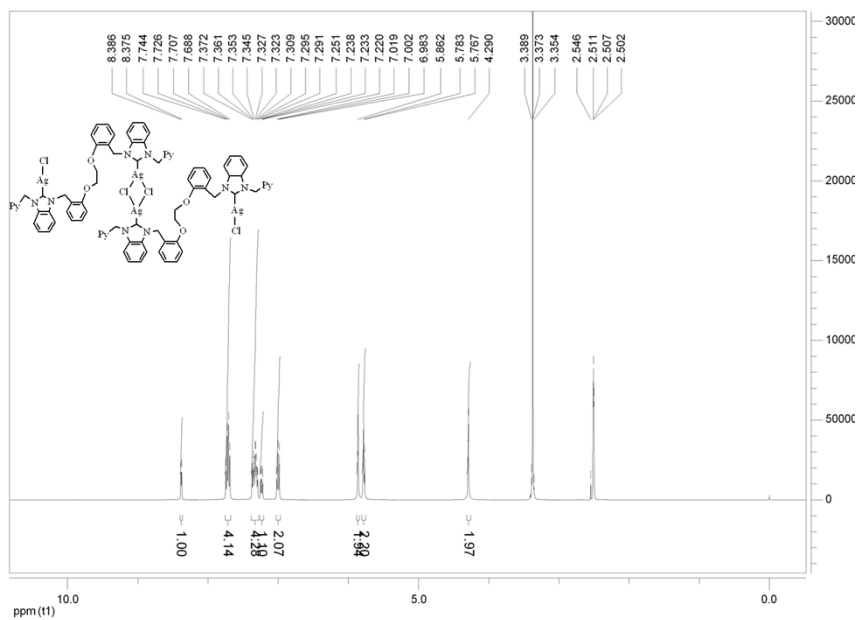

**Fig. S46** The  $^1\text{H}$  NMR (400 MHz,  $\text{DMSO-d}_6$ ) spectra of **8**.

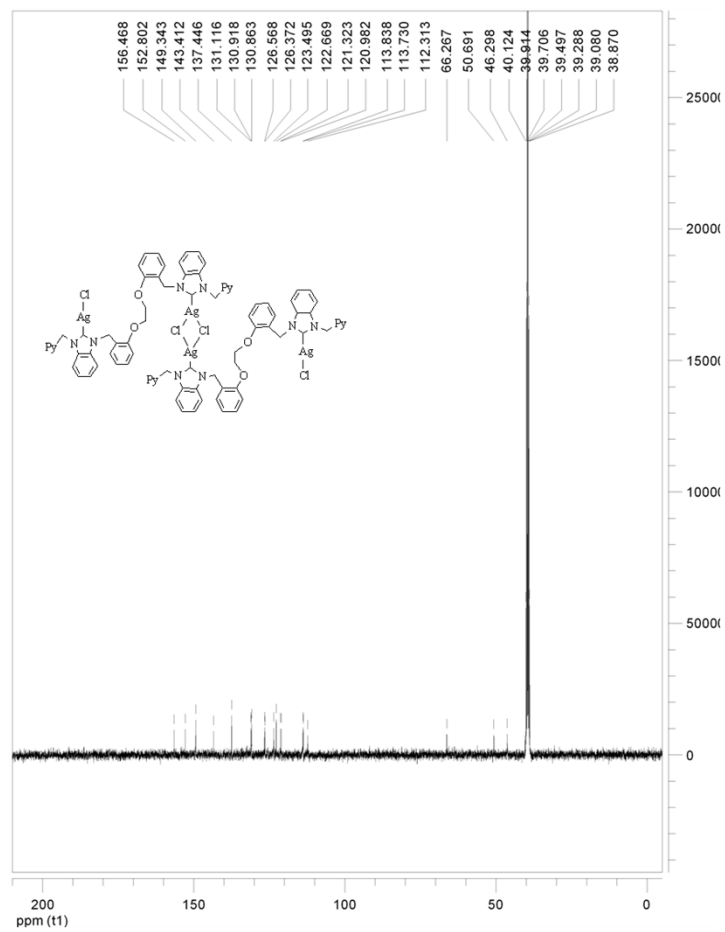

**Fig. S47** The  $^{13}\text{C}$  NMR (100 MHz,  $\text{DMSO-d}_6$ ) spectra of **8**.
